# Supplementary material for: A palladium-catalyzed dehydrative N-benzylation/C–H benzylation cascade of 2-morpholinoanilines on water
Source: Royal Society of Chemistry journal article supplement (doi:10.1039/c7gc03780e), 2018-01-01

## Supporting Information

# Palladium-catalyzed dehydrative *N*-benzylation/*C*-H benzylation cascade of 2-morpholinoanilines on water

Hidemasa Hikawa\*, Risa Ichinose, Shoko Kikkawa and Isao Azumaya\*

*Faculty of Pharmaceutical Sciences, Toho University, Funabashi, Chiba 274-8510, Japan*

*hidemasa.hikawa@phar.toho-u.ac.jp and isao.azumaya@phar.toho-u.ac.jp*

|                                                                                       |               |
|---------------------------------------------------------------------------------------|---------------|
| <b>1. Table of contents</b>                                                           | <b>S1</b>     |
| <b>2. Effects of catalysts and solvents</b>                                           | <b>S2</b>     |
| <b>3. Competitive deuterium labeling experiment</b>                                   | <b>S3</b>     |
| <b>4. Hammett study</b>                                                               | <b>S4</b>     |
| <b>5. Scale-up experiment</b>                                                         | <b>S5</b>     |
| <b>6. Copies of <sup>1</sup>H and <sup>13</sup>C NMR spectra of the all compounds</b> | <b>S6-S36</b> |

**Effects of catalysts and solvents (see Table 1, entry 8).**

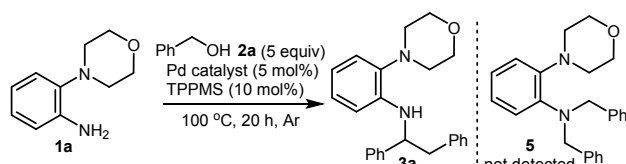

A mixture of 2-morpholinoaniline **1a** (178 mg, 1 mmol), palladium(II) acetate (11 mg, 0.05 mmol), sodium diphenylphosphinobenzene-3-sulfonate (TPPMS, 36 mg, 0.1 mmol) and benzyl alcohol **2a** (515  $\mu$ L, 5 mmol) in H<sub>2</sub>O (4 mL) was heated at 100 °C for 20 h in a sealed tube under Ar. After the reaction mixture was cooled, 1,3,5-trimethoxybenzene (168.2 mg, 1 mmol, internal standard) was added to the reaction mixture, which was extracted with CDCl<sub>3</sub> (8 mL), then the organic layer was analyzed by <sup>1</sup>H-NMR spectroscopy.

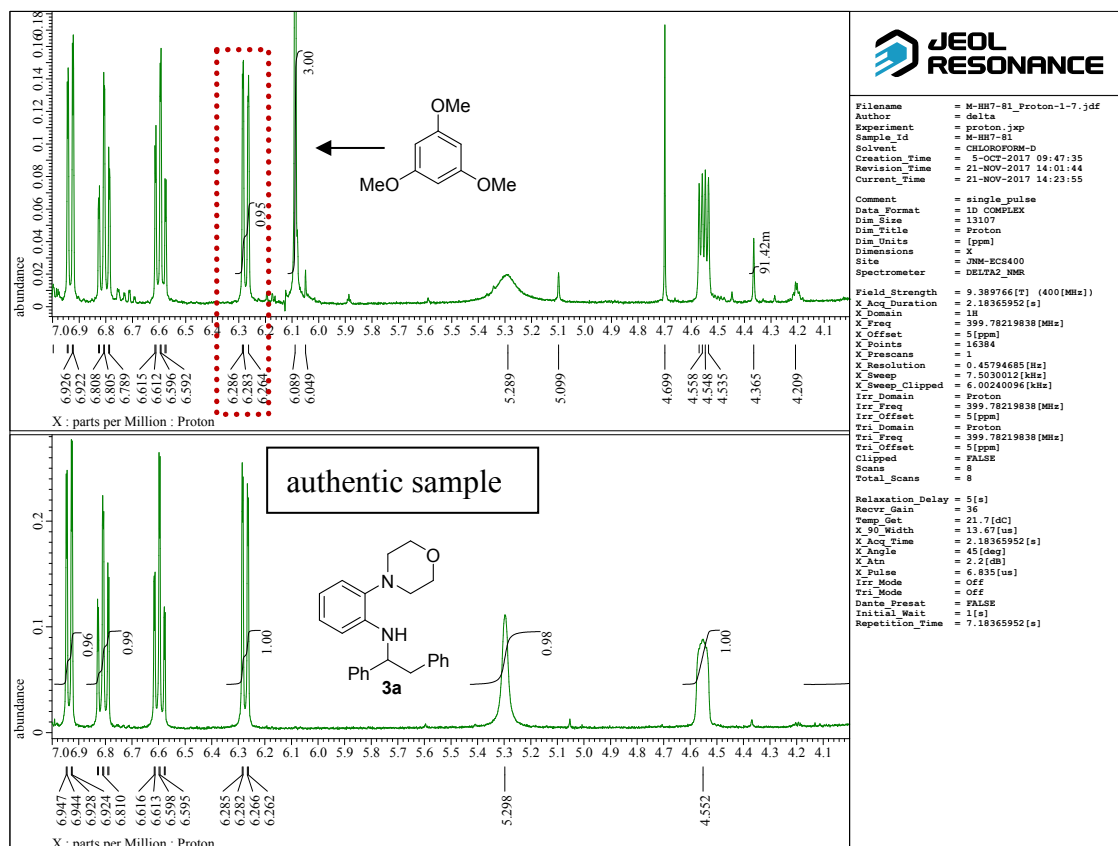

### Competitive deuterium labeling experiment (see Scheme 4A).

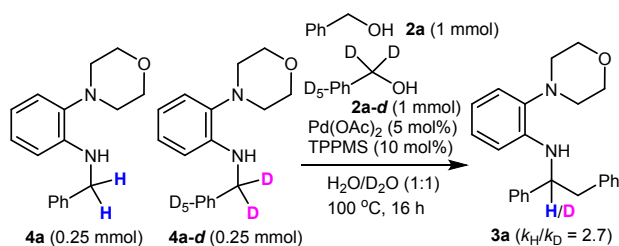

A mixture of **4a** (67.1 mg, 0.25 mmol), **4a-d** (68.9 mg, 0.25 mmol), Pd(OAc)<sub>2</sub> (6 mg, 0.025 mmol), sodium diphenylphosphinobenzene-3-sulfonate (TPPMS, 18 mg, 0.05 mmol), benzyl alcohol **2a** (108 mg, 1.0 mmol), and **2a-d** (115 mg, 1.0 mmol) in H<sub>2</sub>O (1 mL) and D<sub>2</sub>O (1 mL) was heated at 100 °C for 16 h in a sealed tube under air. After cooling, the reaction mixture was poured into water and extracted with EtOAc. The organic layer was washed with brine, dried over MgSO<sub>4</sub> and concentrated in vacuo. The residue was washed with hexanes, then purified by flash column chromatography (silica gel, hexanes/EtOAc) to give desired product **3a**.

|                 |                      |                                        |
|-----------------|----------------------|----------------------------------------|
| Signal $\delta$ | 6.27 (Ar- <u>H</u> ) | 4.55 (methine- <u>H</u> )              |
| Integral value  | 1.00 (1H)            | 0.73 (1H): $k_H/k_D = 0.73/0.27 = 2.7$ |

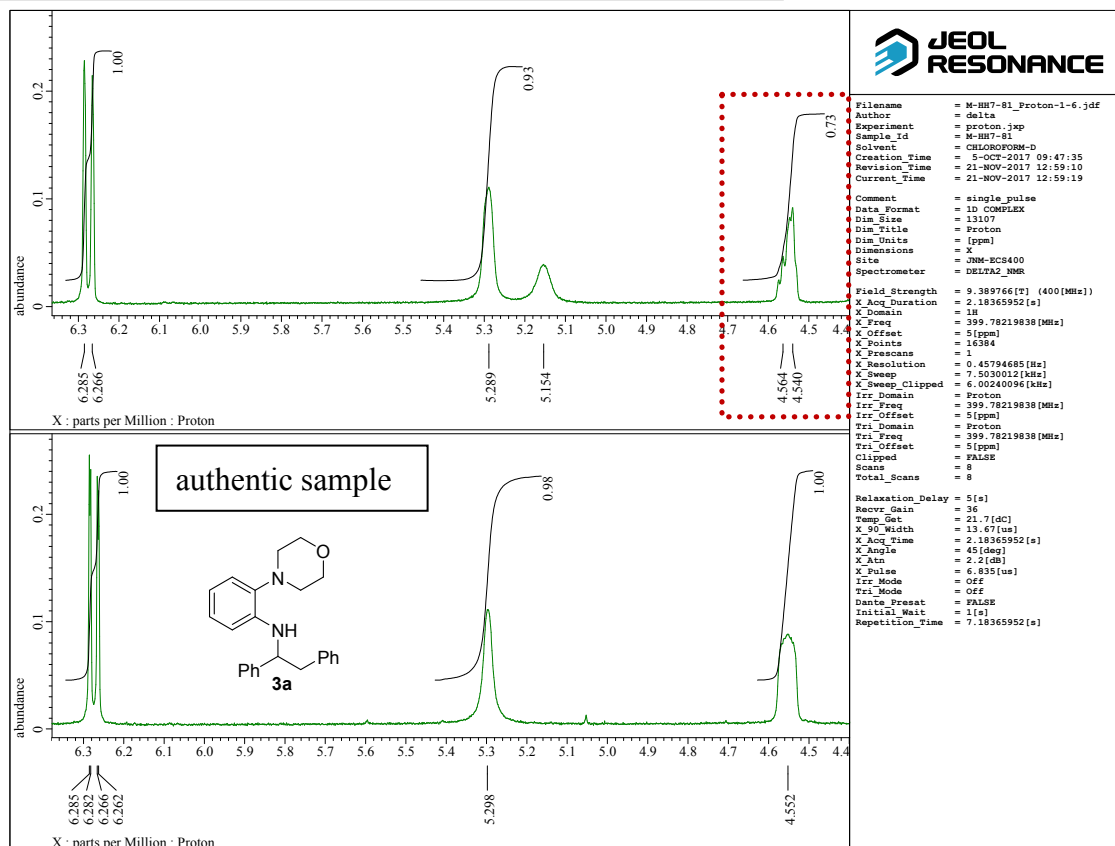

### Hammett study (see Figure 4).

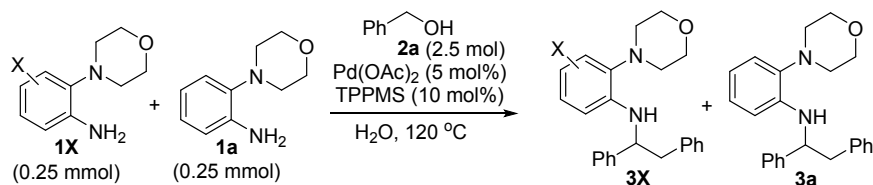

A mixture of 3- or 5-substituted 2-morphoanilines **1** (X = Me, Cl and CF<sub>3</sub> groups) (0.25 mmol), Pd(OAc)<sub>2</sub> (6 mg, 0.025 mmol), sodium diphenylphosphinobenzene-3-sulfonate (TPPMS, 18 mg, 0.05 mmol) and benzylic alcohol **2a** (258 μL, 2.5 mmol) in H<sub>2</sub>O (2 mL) was heated at 120 °C in a sealed tube under air. After cooling, the reaction mixture was poured into water and extracted with EtOAc. The organic layer was washed with brine, dried over MgSO<sub>4</sub> and concentrated in vacuo. The residue was analyzed by <sup>1</sup>H-NMR spectroscopy.

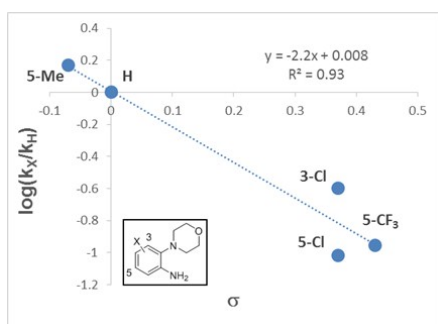

|                       | $\sigma$ | $\log(k_X/k_H)$ |
|-----------------------|----------|-----------------|
| 5-Me (m)              | -0.07    | 0.17            |
| H                     | 0        | 0               |
| 3-Cl (m)              | 0.37     | -0.6            |
| 5-Cl (m)              | 0.37     | -1.02           |
| 5-CF <sub>3</sub> (m) | 0.43     | -0.954          |

X = CF<sub>3</sub>:  $\log(k_X/k_H) = \log(1/9) = -0.95$

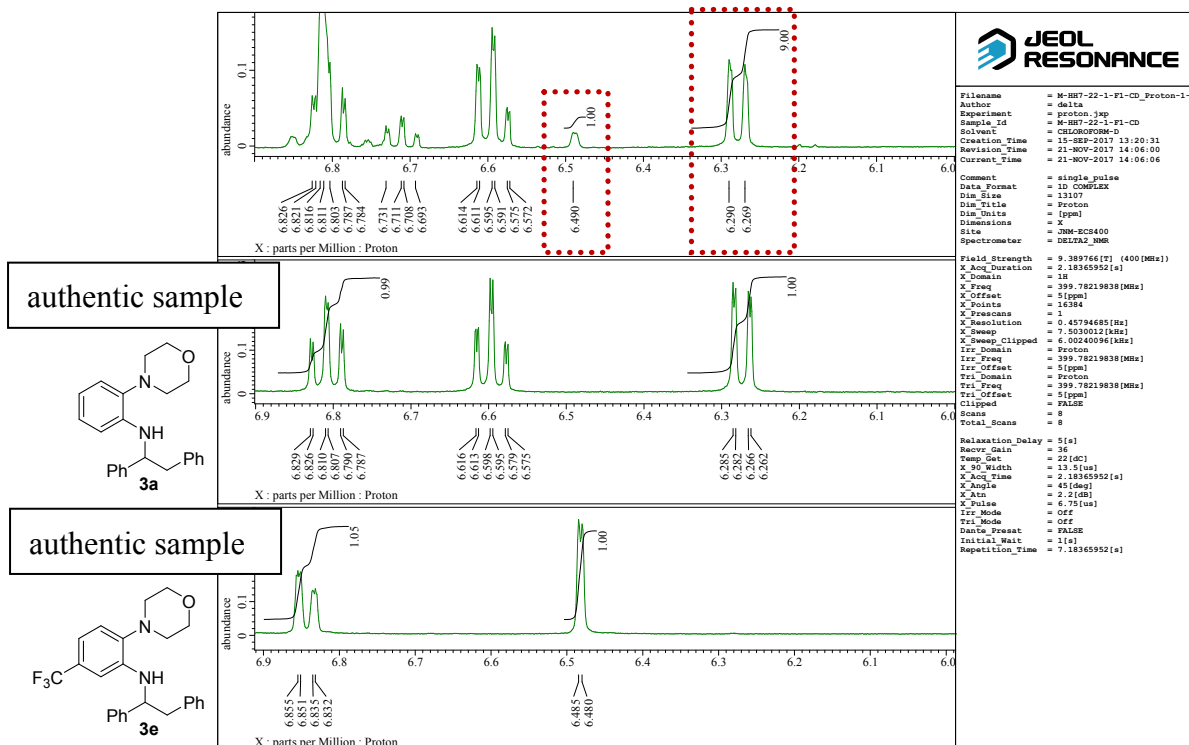

**Scale-up experiment (see Scheme 9).**

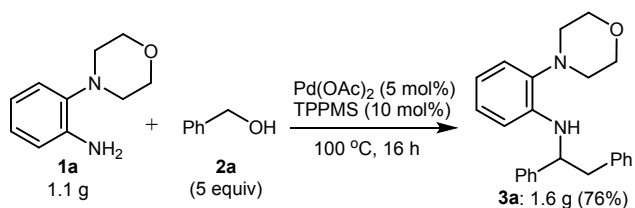

A mixture of 2-morpholinoaniline (1.07 g, 6 mmol), palladium(II) acetate (67.4 mg, 0.3 mmol), TPPMS (218.6 mg, 0.6 mmol), and benzyl alcohol (**2a**, 3.09 mL, 30 mmol) in  $\text{H}_2\text{O}$  (24 mL) was heated at  $100\text{ }^\circ\text{C}$  for 16 h under Ar. After cooling, the reaction mixture was poured into water and extracted with EtOAc. The organic layer was washed with brine, dried over  $\text{MgSO}_4$  and concentrated in vacuo. The residue was recrystallized from hexane/AcOEt to give desired product **3a** (1.63 g, 4.55 mmol, 76%) as a pale yellow solid.

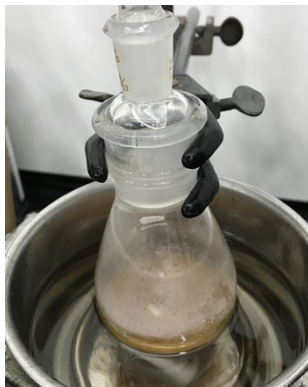

After 10 min

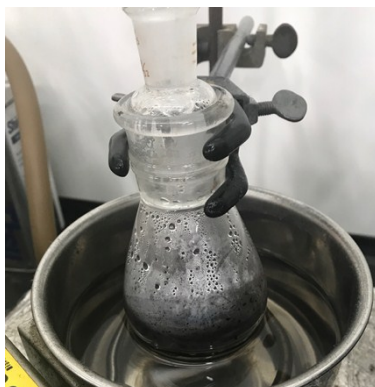

After 16 h

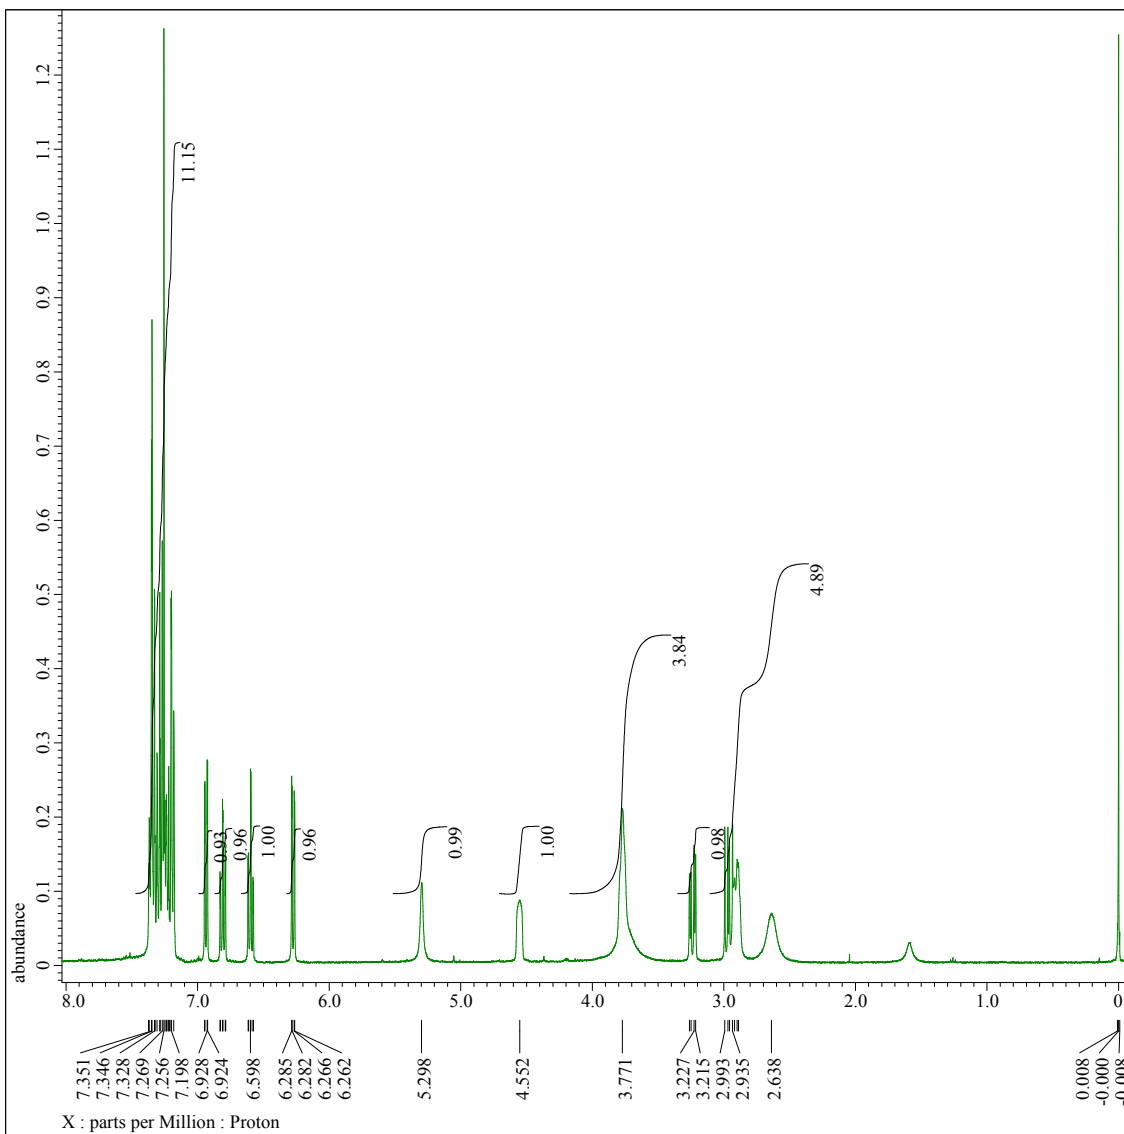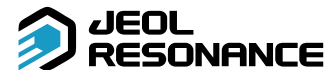

```

Filename      = M-HH7-81_Proton-1-5.jdf
Author       = delta
Experiment   = proton.jxp
Sample Id    = M-HH7-81
Solvent      = CHLOROFORM-D
Creation Time = 5-OCT-2017 09:47:35
Revision Time = 21-NOV-2017 12:56:10
Current Time  = 21-NOV-2017 12:56:17

Comment      = single_pulse
Data Format   = 1D_COMPLEX
Dim Size     = 13107
Dim Title    = Proton
Dim Units    = [ppm]
Dimensions   = X
Site         = JNM-ECS400
Spectrometer = DELTA2_NMR

Field Strength = 9.389766[T] (400[MHz])
X Acq_Duration = 2.18365952[s]
X Domain       = 1H
X Freq        = 399.78219838[MHz]
X_Offset      = 5[ppm]
X_Points      = 16384
X_Frescans    = 1
X_Resolution  = 0.45794685[Hz]
X_Sweep       = 7.5030012[kHz]
X_Sweep_Clipped = 6.00240096[kHz]
Irr_Domain    = Proton
Irr_Freq      = 399.78219838[MHz]
Irr_Offset    = 5[ppm]
Tri_Domain    = Proton
Tri_Freq      = 399.78219838[MHz]
Tri_Offset    = 5[ppm]
Clipped       = FALSE
Scans         = 8
Total_Scans   = 8

Relaxation_Delay = 5[s]
Recvr Gain       = 36
Temp_Get         = 21.7[dC]
X_90_Width      = 13.67[us]
X_Acq_Time      = 2.18365952[s]
X_Angle         = 45[deg]
X_Atn           = 2.2[db]
X_Pulse         = 6.835[us]
Irr_Mode        = Off
Tri_Mode        = Off
Dante_Presat    = FALSE
Initial_Wait    = 1[s]
Repetition_Time = 7.18365952[s]

```

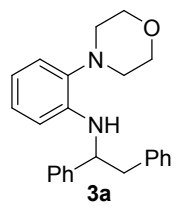

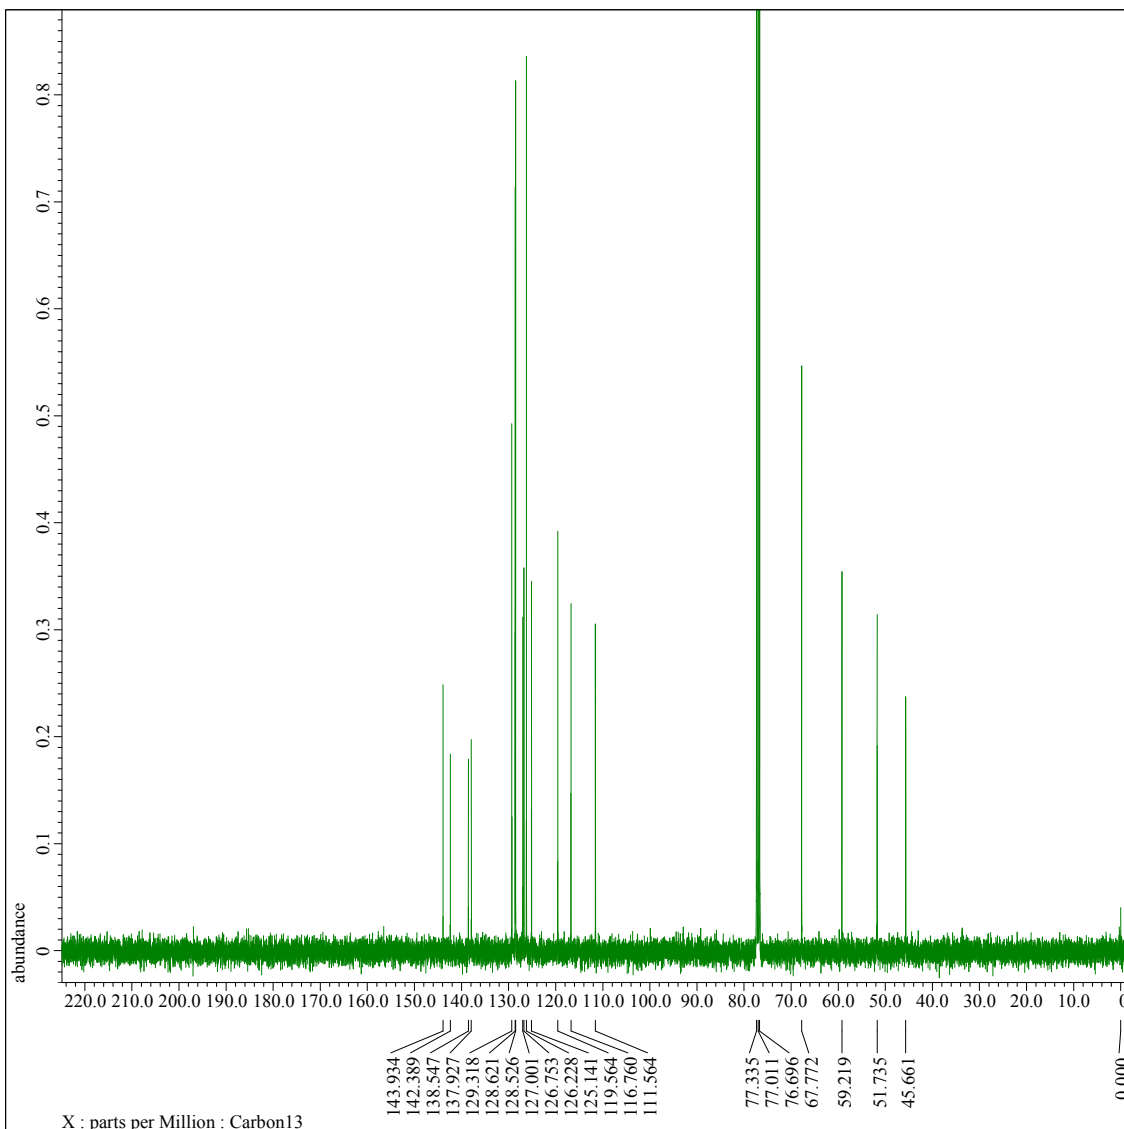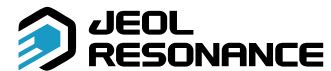

```

Filename      = M-HH7-81-C_Carbon-1-3.jdf
Author       = delta
Experiment   = carbon.jxp
Sample Id    = M-HH7-81-C
Solvent      = CHLOROFORM-D
Creation_Time = 22-NOV-2017 14:03:40
Revision_Time = 22-NOV-2017 14:17:14
Current_Time  = 22-NOV-2017 14:17:42

Comment      = single pulse decoupled gat
Data_Format  = 1D COMPLEX
Dim_Size     = 26214
Dim_Title    = Carbon13
Dim_Units    = [ppm]
Dimensions   = X
Site         = JNM-ECS400
Spectrometer = DELTA2_NMR

Field_Strength = 9.389766[T] (400[MHz])
X_Acq_Duration = 1.04333312[s]
X_Domain       = 13C
X_Freq         = 100.52530333[MHz]
X_Offset       = 100[ppm]
X_Points       = 32768
X_Prescans     = 4
X_Resolution   = 0.95846665[Hz]
X_Sweep        = 31.40703518[kHz]
X_Sweep_Clippped = 25.12562814[kHz]
Irr_Domain     = Proton
Irr_Freq       = 399.78219838[MHz]
Irr_Offset     = 5[ppm]
Clipped        = FALSE
Scans          = 512
Total_Scans    = 512

Relaxation_Delay = 2[s]
Recvr_Gain       = 60
Temp_Get         = 21.9[dC]
X_90_Width      = 9.74[us]
X_Acq_Time      = 1.04333312[s]
X_Angle         = 30[deg]
X_Atn           = 3.3[dB]
X_Pulse         = 3.24666667[us]
Irr_Atn_Dec     = 20.699[dB]
Irr_Atn_No     = 20.699[dB]
Irr_Noise       = WALTZ
Irr_Pwidth      = 0.115[ms]
Decoupling      = TRUE
Initial_Wait    = 1[s]
Noe              = TRUE
Noe_Time        = 2[s]
Repetition_Time = 3.04333312[s]
  
```

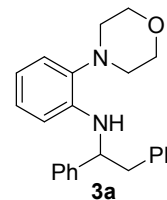

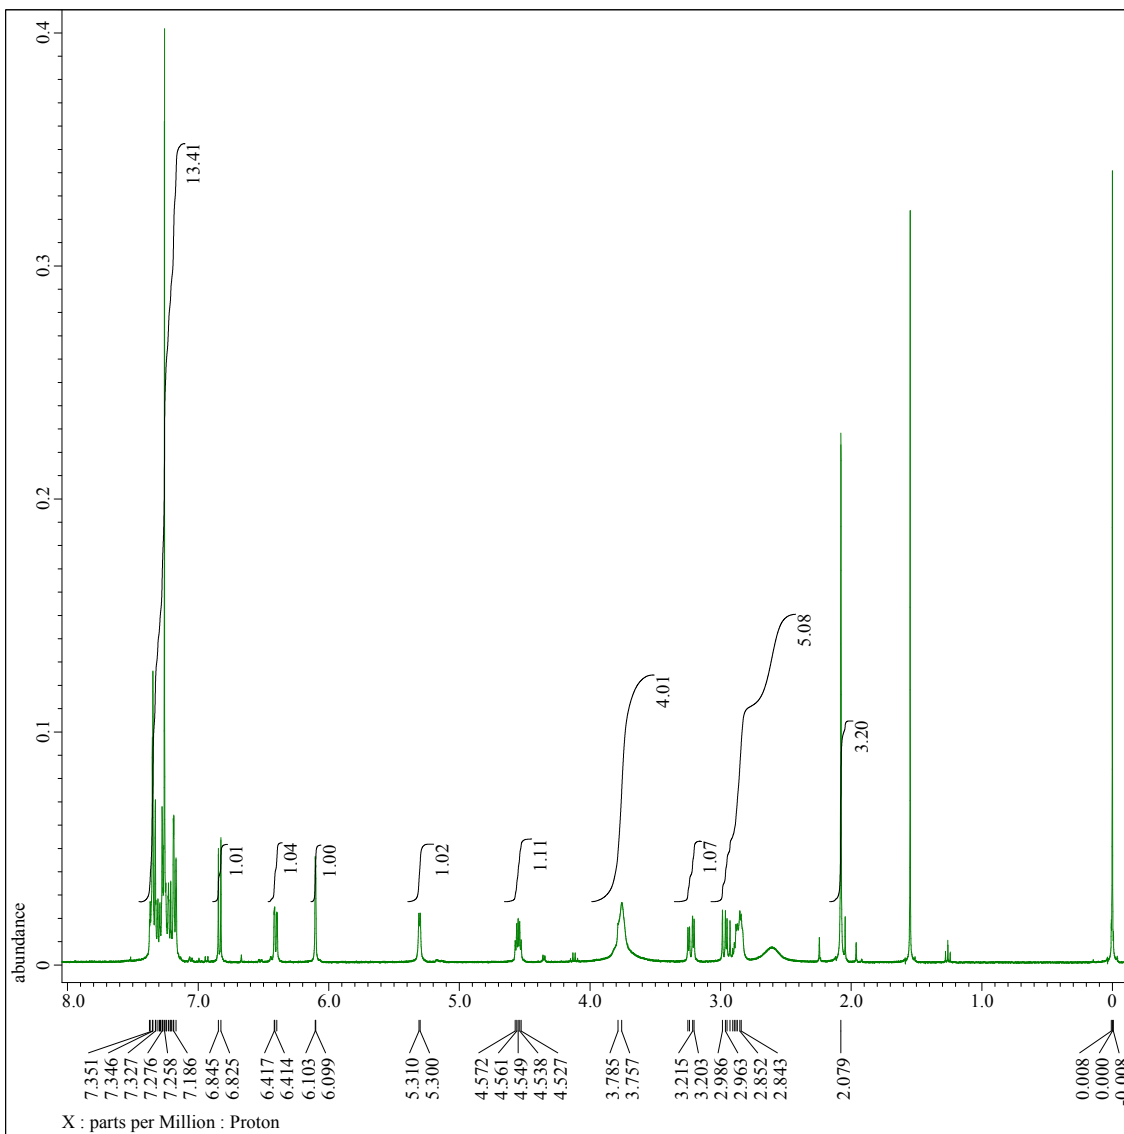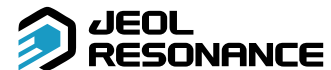

```

Filename      = M-HH7-70-4_Proton-1-7.jdf
Author       = delta
Experiment   = proton.jxp
Sample Id    = M-HH7-70-4
Solvent      = CHLOROFORM-D
Creation Time = 21-OCT-2017 13:06:41
Revision Time = 21-NOV-2017 15:19:35
Current Time  = 21-NOV-2017 15:19:49

Comment      = single_pulse
Data Format   = 1D_COMPLEX
Dim Size     = 52429
Dim Title    = Proton
Dim Units    = [ppm]
Dimensions   = X
Site         = JNM-ECS400
Spectrometer = DELTA2_NMR

Field Strength = 9.389766[T] (400[MHz])
X_Acq_Duration = 8.73463808[s]
X_Domain       = 1H
X_Freq         = 399.78219838[MHz]
X_Offset       = 5[ppm]
X_Points       = 65536
X_Prescans     = 1
X_Resolution   = 0.11448671[Hz]
X_Sweep        = 7.5030012[kHz]
X_Sweep_Clipped = 6.00240096[kHz]
Irr_Domain     = Proton
Irr_Freq       = 399.78219838[MHz]
Irr_Offset     = 5[ppm]
Tri_Domain     = Proton
Tri_Freq       = 399.78219838[MHz]
Tri_Offset     = 5[ppm]
Clipped        = FALSE
Scans          = 8
Total_Scans    = 8

Relaxation_Delay = 5[s]
Recvr Gain       = 36
Temp_Get         = 21.6[dC]
X_90_Width      = 13.67[us]
X_Acq_Time      = 8.73463808[s]
X_Angle         = 45[deg]
X_Atn           = 2.2[db]
X_Pulse         = 6.835[us]
Irr_Mode        = OFF
Tri_Mode        = OFF
Dante_Preset    = FALSE
Initial_Wait    = 1[s]
Repetition_Time = 13.73463808[s]
  
```

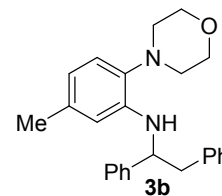



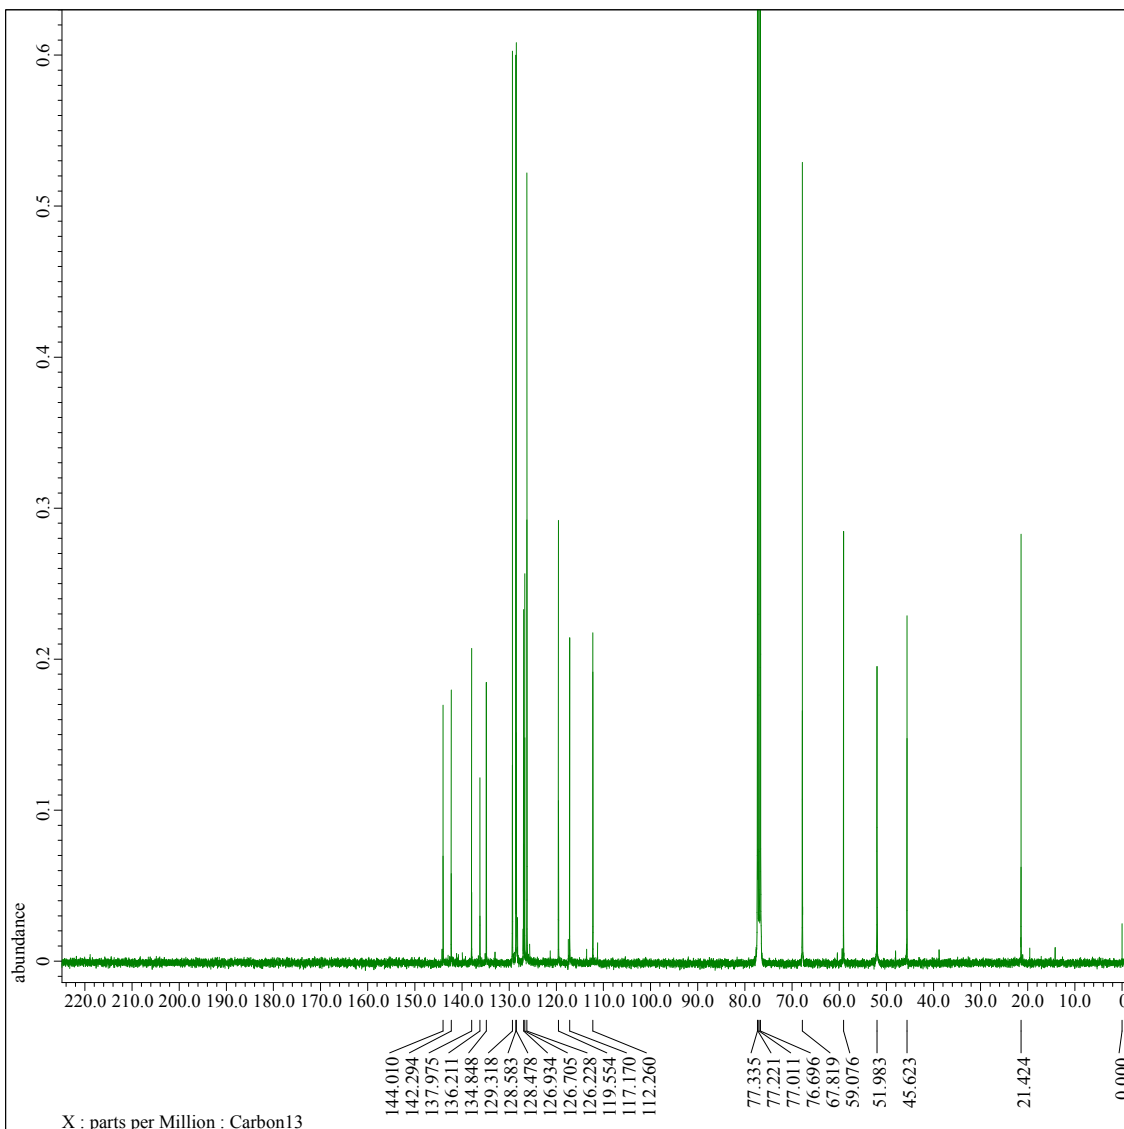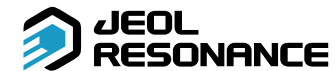

```

Filename      = M-HH7-70-4-C_Carbon-1-5.jd
Author       = delta
Experiment   = carbon.jxp
Sample Id    = M-HH7-70-4-C
Solvent      = CHLOROFORM-D
Creation Time = 22-OCT-2017 09:20:15
Revision Time = 21-NOV-2017 15:23:55
Current Time  = 21-NOV-2017 15:24:06

Comment      = single pulse decoupled gat
Data Format   = 1D COMPLEX
Dim Size     = 26214
Dim Title    = Carbon13
Dim Units    = [ppm]
Dimensions   = X
Site         = JNM-ECS400
Spectrometer = DELTA2_NMR

Field Strength = 9.389766[T] (400[MHz])
X Acq_Duration = 1.04333312[s]
X Domain      = 13C
X Freq        = 100.52530333[MHz]
X_Offset      = 100[ppm]
X_Points     = 32768
X_Prescans   = 4
X_Resolution = 0.95846665[Hz]
X_Sweep      = 31.40703518[kHz]
X_Sweep_Clip = 25.12562814[kHz]
Irr_Domain    = Proton
Irr_Freq      = 399.78219838[MHz]
Irr_Offset    = 5[ppm]
Clipped      = FALSE
Scans        = 12000
Total_Scans  = 12000

Relaxation_Delay = 2[s]
Recvr_Gain       = 60
Temp_Get         = 22.2[dC]
X_90_Width      = 9.74[us]
X_Acq_Time      = 1.04333312[s]
X_Angle         = 30[deg]
X_Atn           = 3.3[dB]
X_Pulse         = 3.24666667[us]
Irr_Atn_Dec     = 20.699[dB]
Irr_Atn_Noise  = 20.699[dB]
Irr_Noise       = WALTZ
Irr_Pwidth      = 0.115[ms]
Decoupling      = TRUE
Initial_Wait    = 1[s]
Noe              = TRUE
Noe_Time        = 2[s]
Repetition_Time = 3.04333312[s]

```

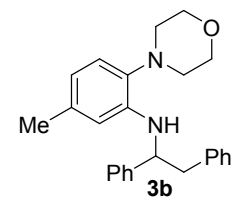

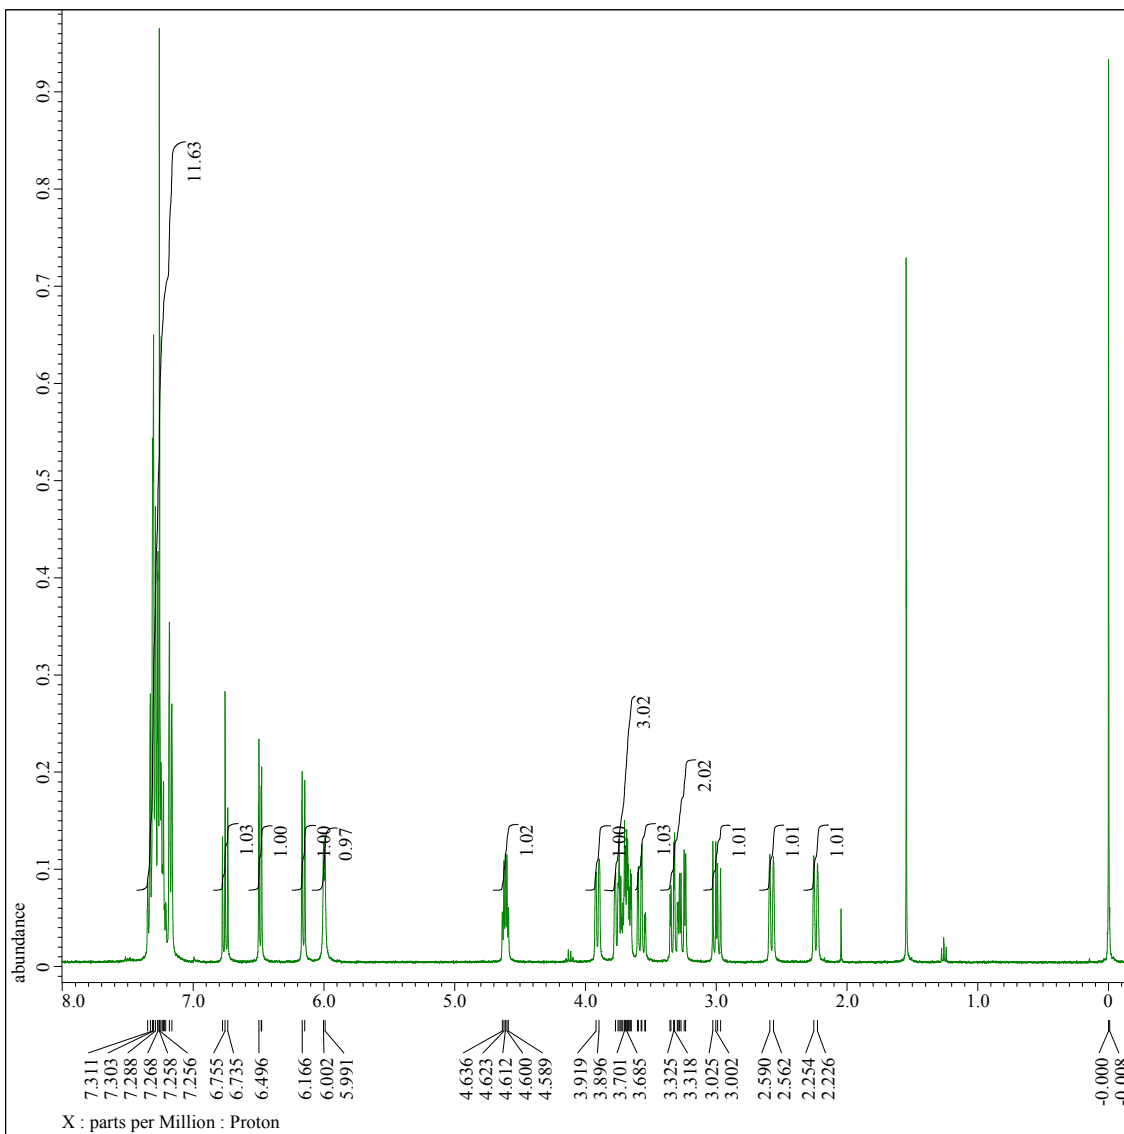

```

Filename      = M-HH7-70-2_Proton-1-6.jdf
Author       = delta
Experiment   = proton.jxp
Sample Id    = M-HH7-70-2
Solvent      = CHLOROFORM-D
Creation Time = 11-SEP-2017 12:37:55
Revision Time = 21-NOV-2017 15:47:58
Current Time  = 21-NOV-2017 15:48:17

Comment      = single_pulse
Data Format   = 1D_COMPLEX
Dim Size     = 13107
Dim Title    = Proton
Dim Units    = [ppm]
Dimensions   = X
Site         = JNM-ECS400
Spectrometer = DELTA2_NMR

Field Strength = 9.389766[T] (400[MHz])
X_Acq_Duration = 2.18365952[s]
X_Domain       = 1H
X_Freq         = 399.78219838[MHz]
X_Offset      = 5[ppm]
X_Points      = 16384
X_Prescans    = 1
X_Resolution  = 0.45794685[Hz]
X_Sweep       = 7.5030012[kHz]
X_Sweep_Clipped = 6.00240096[kHz]
Irr_Domain    = Proton
Irr_Freq      = 399.78219838[MHz]
Irr_Offset    = 5[ppm]
Tri_Domain    = Proton
Tri_Freq      = 399.78219838[MHz]
Tri_Offset    = 5[ppm]
Clipped       = FALSE
Scans         = 8
Total_Scans   = 8

Relaxation_Delay = 5[s]
Recvr Gain       = 36
Temp_Get         = 22[dC]
X_90_Width      = 13.5[us]
X_Acq_Time      = 2.18365952[s]
X_Angle         = 45[deg]
X_Atn           = 2.2[db]
X_Pulse         = 6.75[us]
Irr_Mode        = Off
Tri_Mode        = Off
Dante_Presat    = FALSE
Initial_Wait    = 1[s]
Repetition_Time = 7.18365952[s]
  
```

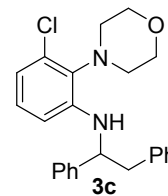

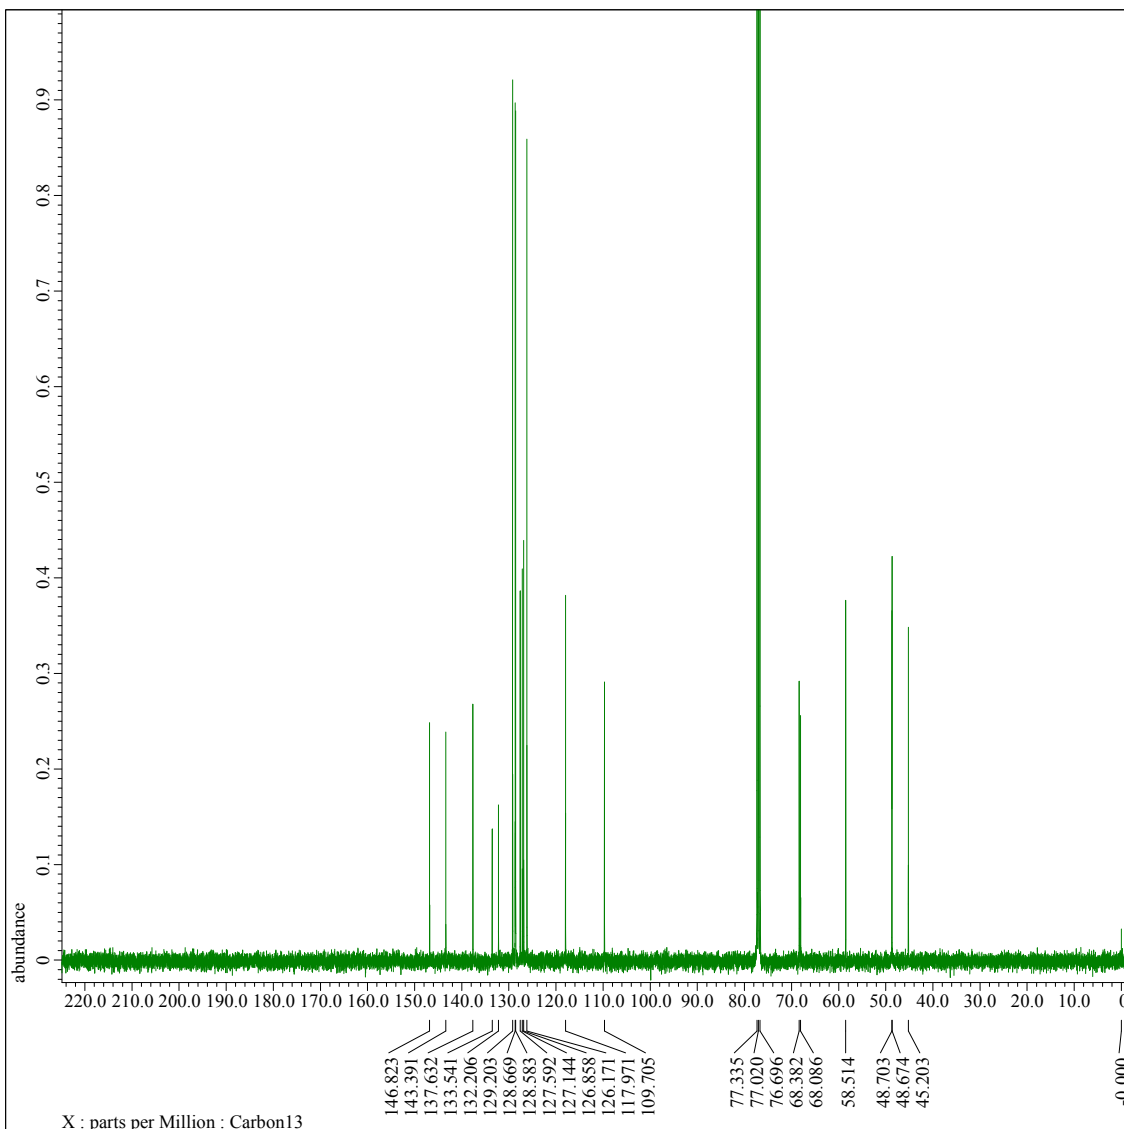

X : parts per Million : Carbon13

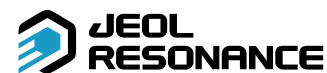

```

Filename      = M-HH7-70-2-C_Carbon-1-3.jd
Author       = delta
Experiment   = carbon.jxp
Sample Id    = M-HH7-70-2-C
Solvent      = CHLOROFORM-D
Creation Time = 30-SEP-2017 18:46:40
Revision Time = 2-OCT-2017 13:08:16
Current Time  = 21-NOV-2017 15:49:46

Comment      = single pulse decoupled gat
Data Format   = 1D COMPLEX
Dim Size     = 26214
Dim Title    = Carbon13
Dim Units    = [ppm]
Dimensions   = X
Site         = JNM-ECS400
Spectrometer = DELTA2_NMR

Field Strength = 9.389766[T] (400[MHz])
X Acq_Duration = 1.04333312[s]
X_Domain      = 13C
X_Freq        = 100.52530333[MHz]
X_Offset      = 100[ppm]
X_Points     = 32768
X_Frescans   = 4
X_Resolution = 0.95846665[Hz]
X_Sweep      = 31.40703518[kHz]
X_Sweep_Clip = 25.12562814[kHz]
Irr_Domain    = Proton
Irr_Freq     = 399.78219838[MHz]
Irr_Offset   = 5[ppm]
Clipped      = TRUE
Scans        = 1024
Total_Scans  = 1024

Relaxation_Delay = 2[s]
Recvr_Gain      = 60
Temp_Get       = 22.3[dC]
X_90_Width     = 9.74[us]
X_Acq_Time     = 1.04333312[s]
X_Angle        = 30[deg]
X_Atn          = 3.3[dB]
X_Pulse        = 3.24666667[us]
Irr_Atn_Dec    = 20.699[dB]
Irr_Atn_Noise = 20.699[dB]
Irr_Noise     = WALTZ
Irr_Pwidth    = 0.115[ms]
Decoupling    = TRUE
Initial_Wait   = 1[s]
Noe            = TRUE
Noe_Time      = 2[s]
Repetition_Time = 3.04333312[s]
  
```

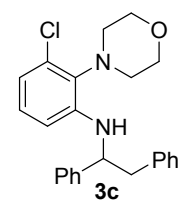

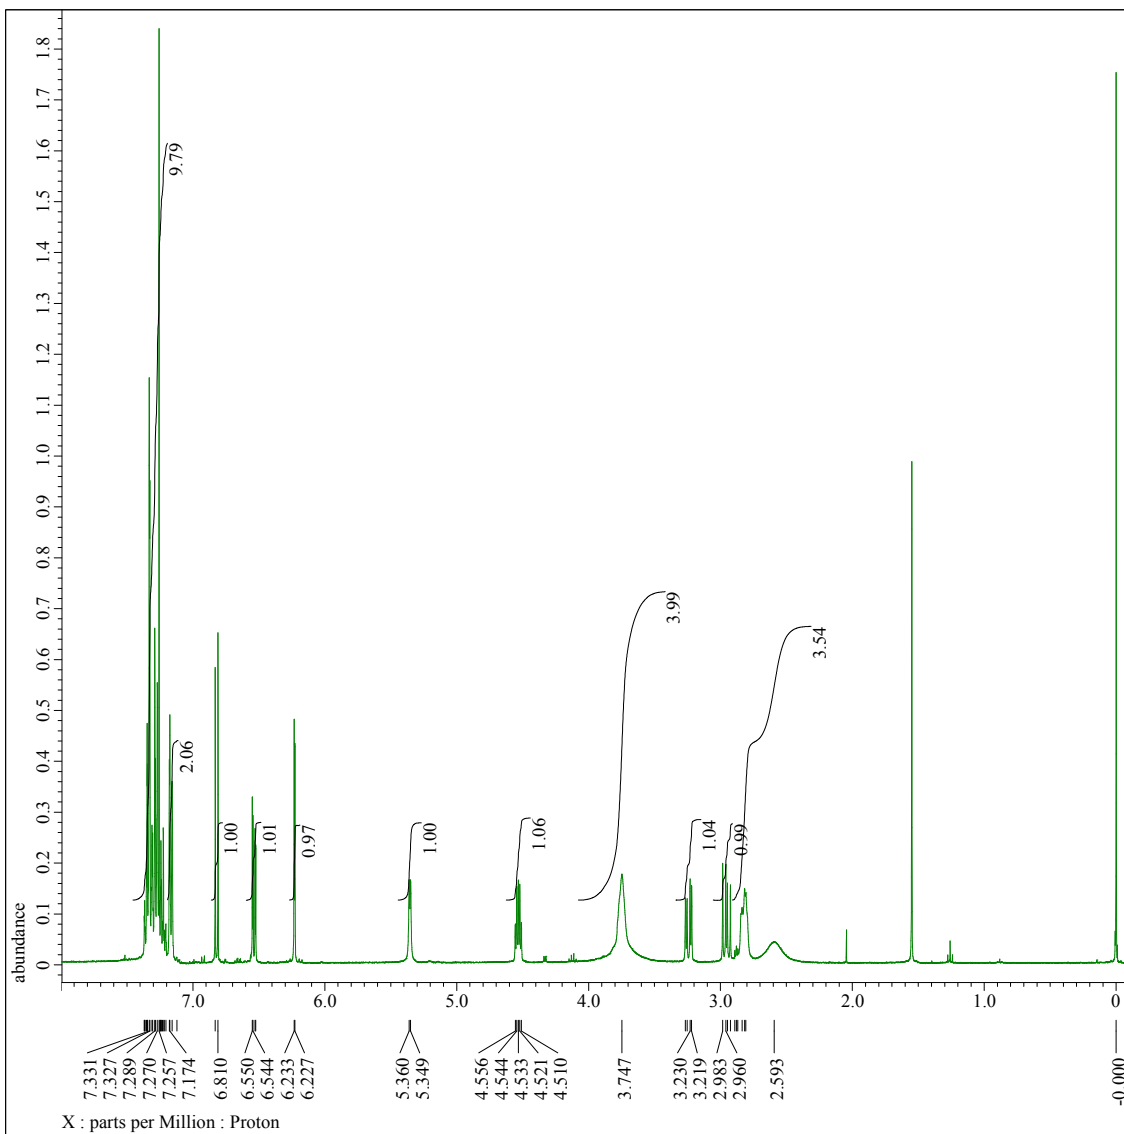

```

Filename      = M-HH7-70-3-F2-2_Proton-1-9
Author       = delta
Experiment   = proton.jxp
Sample Id    = M-HH7-70-3-F2-2
Solvent      = CHLOROFORM-D
Creation Time = 11-OCT-2017 09:14:24
Revision Time = 21-NOV-2017 15:54:50
Current Time  = 21-NOV-2017 15:55:09

Comment      = single_pulse
Data Format   = 1D_COMPLEX
Dim Size     = 13107
Dim Title    = Proton
Dim Units    = [ppm]
Dimensions   = X
Site         = JNM-ECS400
Spectrometer = DELTA2_NMR

Field Strength = 9.389766[T] (400[MHz])
X Acq_Duration = 2.18365952[s]
X_Domain      = 1H
X_Freq        = 399.78219838[MHz]
X_Offset      = 5[ppm]
X_Points      = 16384
X_Prescans    = 1
X_Resolution  = 0.45794685[Hz]
X_Sweep       = 7.5030012[kHz]
X_Sweep_Clipped = 6.00240096[kHz]
Irr_Domain    = Proton
Irr_Freq      = 399.78219838[MHz]
Irr_Offset    = 5[ppm]
Tri_Domain    = Proton
Tri_Freq      = 399.78219838[MHz]
Tri_Offset    = 5[ppm]
Clipped       = FALSE
Scans         = 8
Total_Scans   = 8

Relaxation_Delay = 5[s]
Recvr Gain       = 36
Temp_Get         = 22.1[dC]
X_90_Width      = 13.67[us]
X_Acq_Time      = 2.18365952[s]
X_Angle         = 45[deg]
X_Atn           = 2.2[dB]
X_Pulse         = 6.835[us]
Irr_Mode        = Off
Tri_Mode        = Off
Dante_Presat    = FALSE
Initial_Wait    = 1[s]
Repetition_Time = 7.18365952[s]
  
```

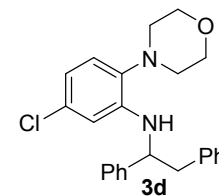

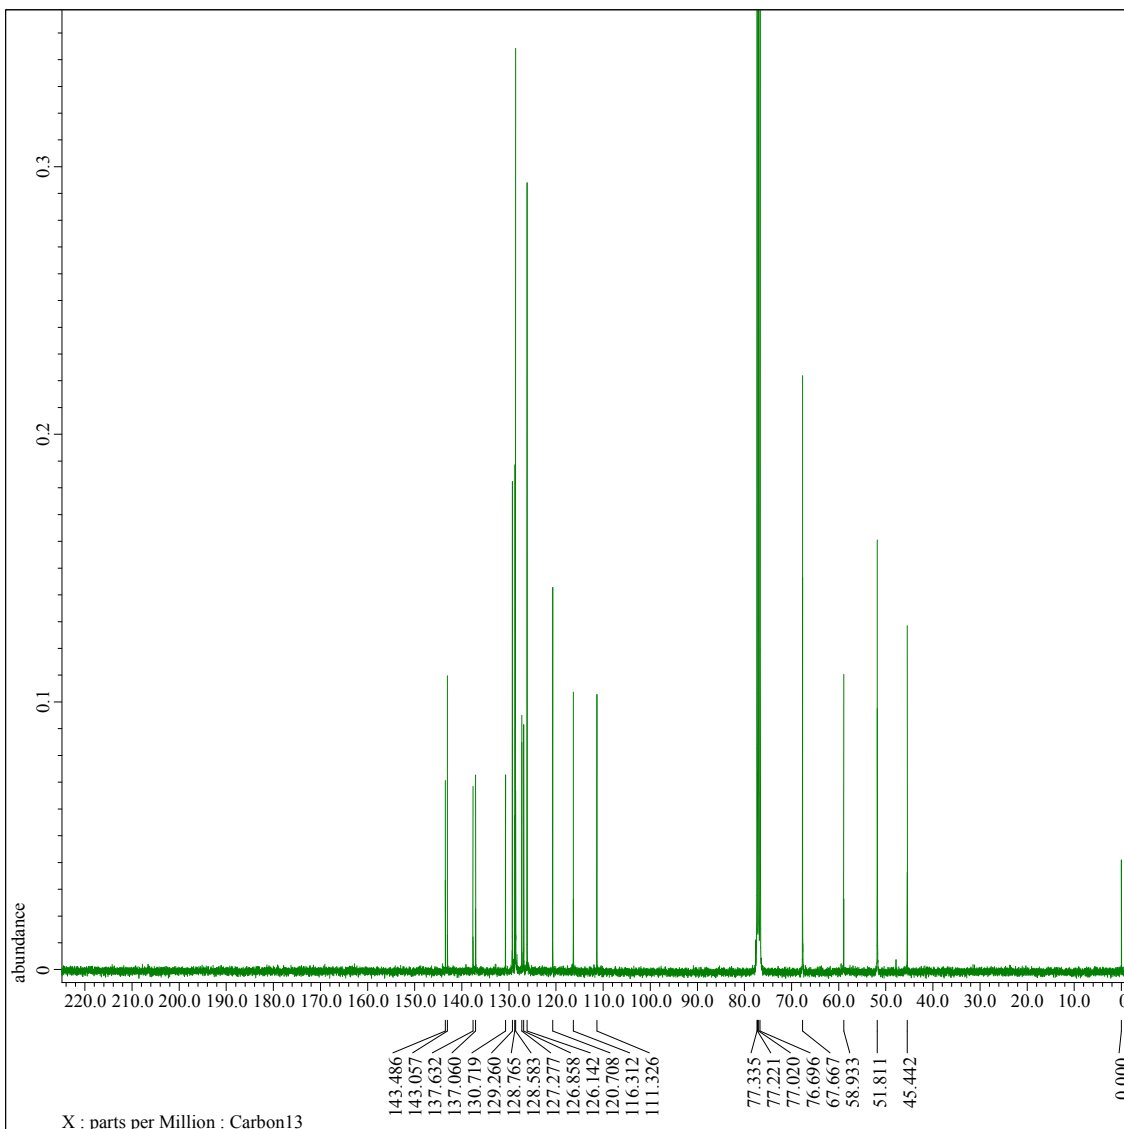

```

Filename      = M-HH7-70-3-F2-C_Carbon-1-4
Author       = delta
Experiment   = carbon.jxp
Sample Id    = M-HH7-70-3-F2-C
Solvent      = CHLOROFORM-D
Creation_Time = 14-OCT-2017 14:54:59
Revision_Time = 16-OCT-2017 09:49:08
Current_Time = 21-NOV-2017 15:56:34

Comment      = single pulse decoupled gat
Data Format   = 1D COMPLEX
Dim Size     = 26214
Dim Title    = Carbon13
Dim Units    = [ppm]
Dimensions   = X
Site         = JNM-ECS400
Spectrometer = DELTA2_NMR

Field Strength = 9.389766[T] (400[MHz])
X Acq_Duration = 1.04333312[s]
X Domain      = 13C
X Freq        = 100.52530333[MHz]
X Offset      = 100[ppm]
X Points      = 32768
X Freqs      = 4
X Resolution  = 0.95846665[Hz]
X Sweep      = 31.40703518[kHz]
X Sweep_Clip = 25.12562814[kHz]
Irr_Domain    = Proton
Irr_Freq      = 399.78219838[MHz]
Irr_Offset    = 5[ppm]
Clipped       = FALSE
Scans         = 35000
Total_Scans   = 35000

Relaxation_Delay = 2[s]
Recvr_Gain       = 60
Temp_Get         = 21.9[dC]
X_90_Width      = 9.74[us]
X_Acq_Time      = 1.04333312[s]
X_Angle         = 30[deg]
X_Atn           = 3.3[dB]
X_Pulse         = 3.24666667[us]
Irr_Atn_Dec     = 20.699[dB]
Irr_Atn_Noise  = 20.699[dB]
Irr_Noise      = WALTZ
Irr_Pwidth     = 0.115[ms]
Decoupling      = TRUE
Initial_Wait    = 1[s]
Noe             = TRUE
Noe_Time        = 2[s]
Repetition_Time = 3.04333312[s]
  
```

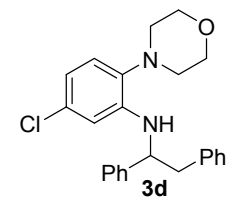

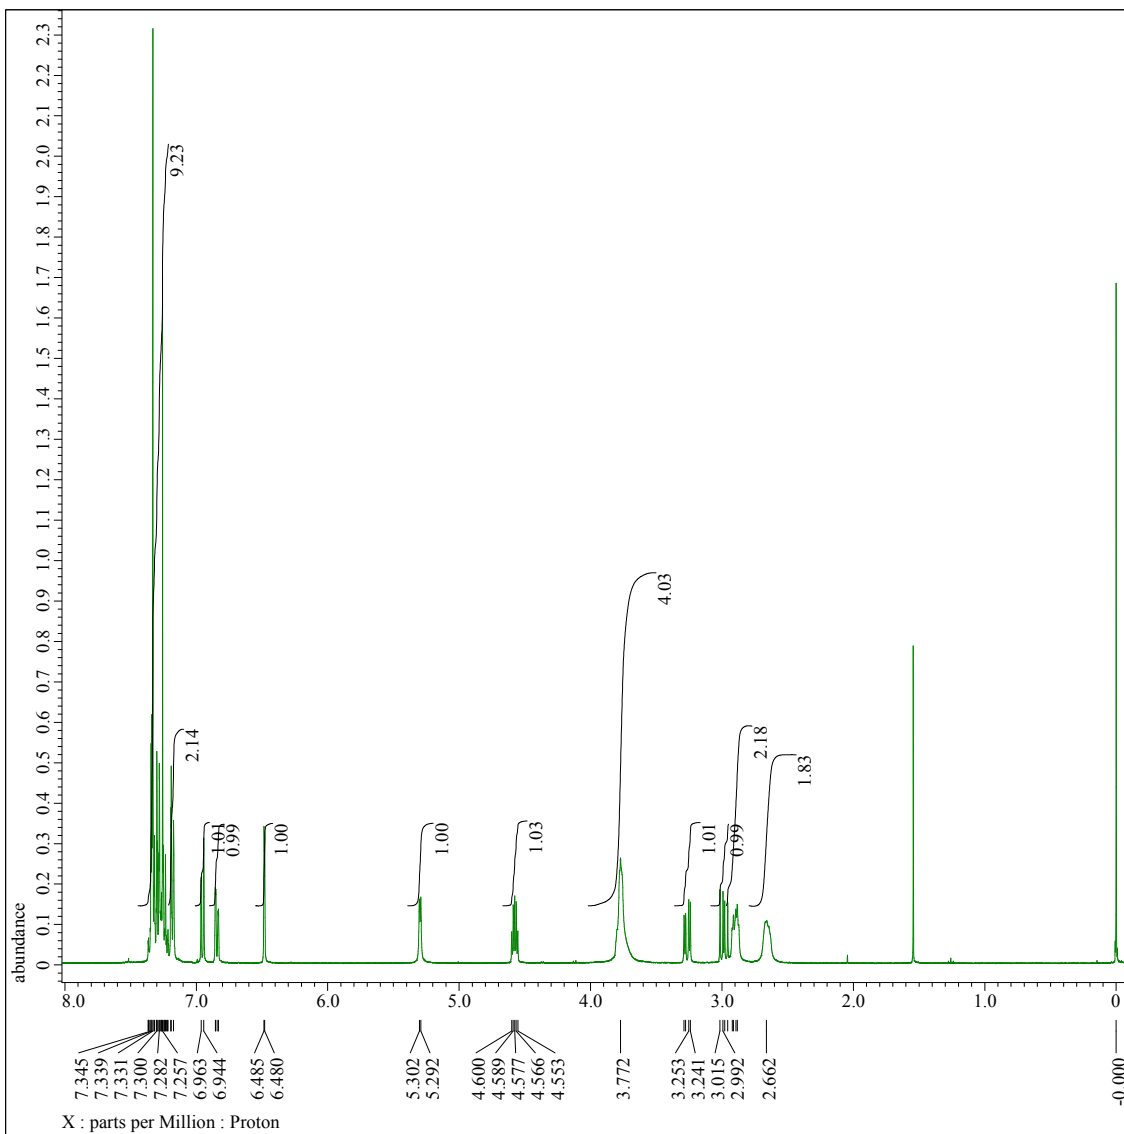

```

Filename      = M-HH7-22-1-F1-CD_Proton-1-
Author       = delta
Experiment   = proton.jxp
Sample Id    = M-HH7-22-1-F1-CD
Solvent      = CHLOROFORM-D
Creation Time = 15-SEP-2017 13:20:31
Revision Time = 21-NOV-2017 16:00:49
Current Time  = 21-NOV-2017 16:01:05

Comment      = single_pulse
Data Format   = 1D_COMPLEX
Dim Size     = 13107
Dim Title    = Proton
Dim Units    = [ppm]
Dimensions   = X
Site         = JNM-ECS400
Spectrometer = DELTA2_NMR

Field Strength = 9.389766[T] (400[MHz])
X Acq_Duration = 2.18365952[s]
X_Domain      = 1H
X_Freq        = 399.78219838[MHz]
X_Offset      = 5[ppm]
X_Points     = 16384
X_Prescans   = 1
X_Resolution = 0.45794685[Hz]
X_Sweep      = 7.5030012[kHz]
X_Sweep_Clipped = 6.00240096[kHz]
Irr_Domain    = Proton
Irr_Freq      = 399.78219838[MHz]
Irr_Offset    = 5[ppm]
Tri_Domain    = Proton
Tri_Freq      = 399.78219838[MHz]
Tri_Offset    = 5[ppm]
Clipped      = FALSE
Scans         = 8
Total_Scans  = 8

Relaxation_Delay = 5[s]
Recvr Gain       = 36
Temp_Get         = 22[dC]
X_90_Width      = 13.5[us]
X_Acq_Time      = 2.18365952[s]
X_Angle         = 45[deg]
X_Atn           = 2.2[dB]
X_Pulse         = 6.75[us]
Irr_Mode        = Off
Tri_Mode        = Off
Dante_Presat    = FALSE
Initial_Wait    = 1[s]
Repetition_Time = 7.18365952[s]
  
```

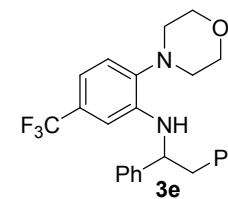

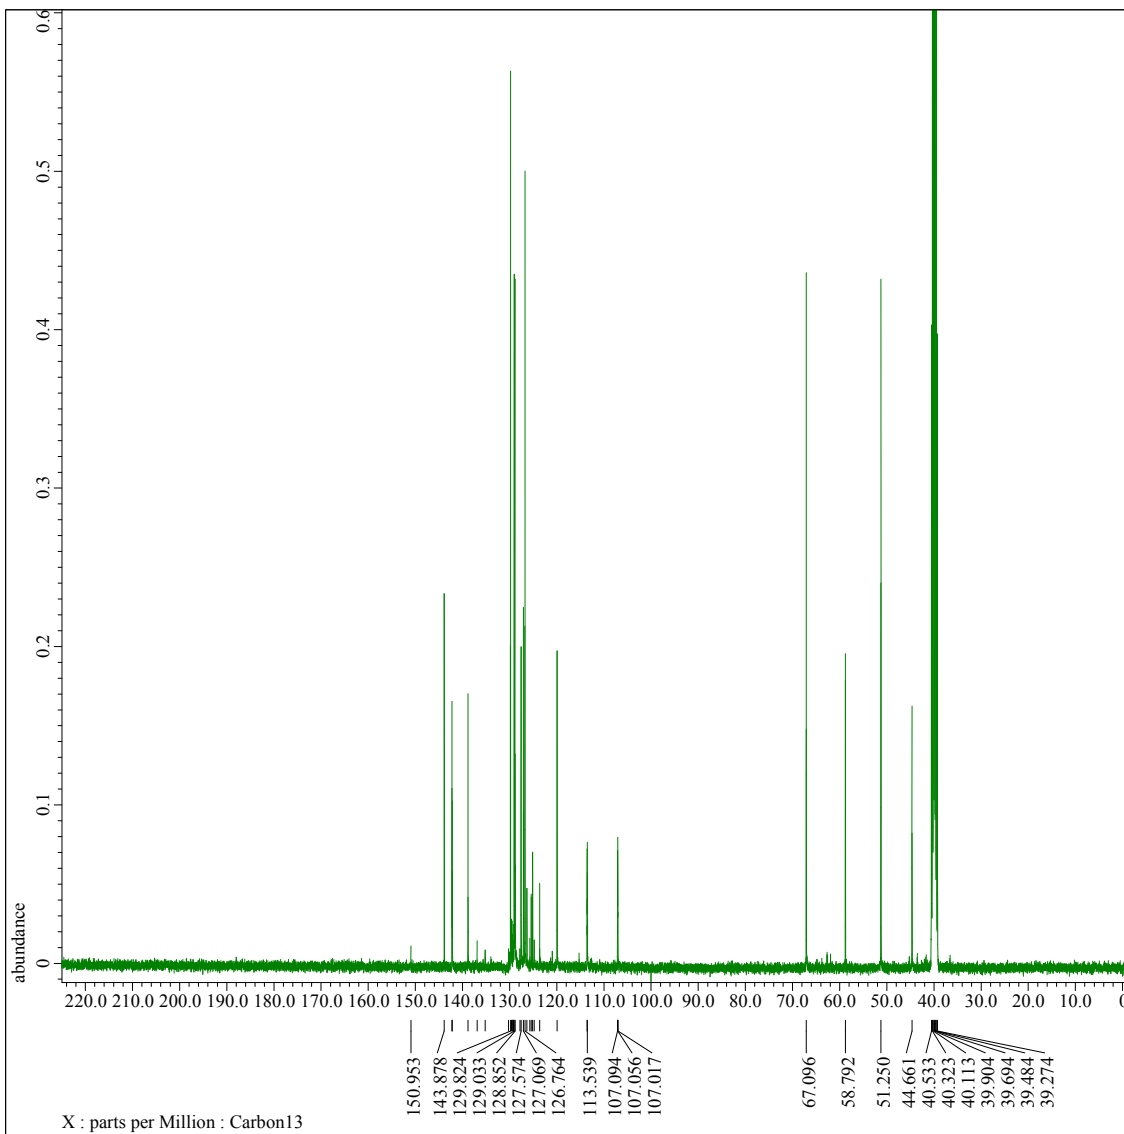

```

Filename      = M-HH7-22-1-F1_Carbon-1-3.j
Author       = delta
Experiment   = carbon.jxp
Sample Id    = M-HH7-22-1-F1
Solvent      = DMSO-D6
Creation_Time = 26-SEP-2017 23:33:13
Revision_Time = 21-NOV-2017 16:03:01
Current_Time = 21-NOV-2017 16:03:26

Comment      = single pulse decoupled gat
Data_Format  = 1D COMPLEX
Dim_Size     = 26214
Dim_Title    = Carbon13
Dim_Units    = [ppm]
Dimensions   = X
Site         = JNM-ECS400
Spectrometer = DELTA2_NMR

Field_Strength = 9.389766[T] (400[MHz])
X_Acq_Duration = 1.04333312[s]
X_Domain       = 13C
X_Freq         = 100.52530333[MHz]
X_Offset       = 100[ppm]
X_Points       = 32768
X_Prescans     = 4
X_Resolution   = 0.95846665[Hz]
X_Sweep        = 31.40703518[kHz]
X_Sweep_Clipped = 25.12562814[kHz]
Irr_Domain     = Proton
Irr_Freq       = 399.78219838[MHz]
Irr_Offset     = 5[ppm]
Clipped        = FALSE
Scans          = 8000
Total_Scans    = 8000

Relaxation_Delay = 2[s]
Recvr_Gain       = 60
Temp_Get         = 22.4[dC]
X_90_Width      = 9.74[us]
X_Acq_Time      = 1.04333312[s]
X_Angle         = 30[deg]
X_Atn           = 3.3[dB]
X_Pulse         = 3.24666667[us]
Irr_Atn_Dec     = 20.699[dB]
Irr_Atn_Noise  = 20.699[dB]
Irr_Noise       = WALTZ
Irr_Pwidth      = 0.115[ms]
Decoupling      = TRUE
Initial_Wait    = 1[s]
Noe              = TRUE
Noe_Time        = 2[s]
Repetition_Time = 3.04333312[s]
  
```

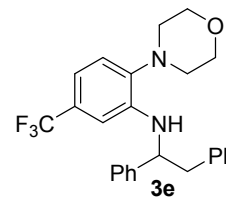

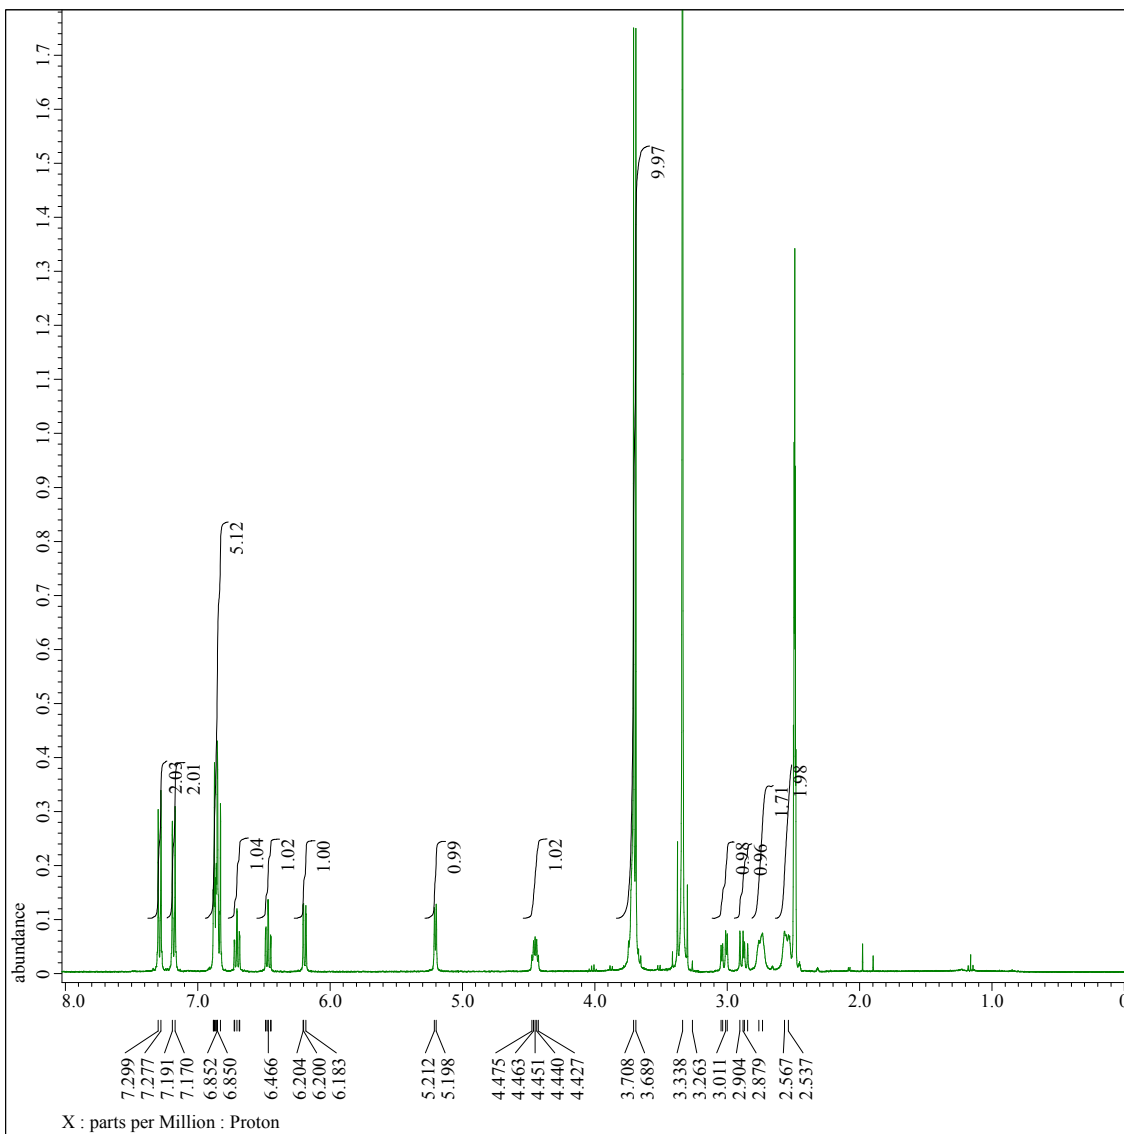

```

Filename      = M-HH7-21-1-F2_Proton-1-4.j
Author       = delta
Experiment   = proton.jxp
Sample Id    = M-HH6-21-1-F2
Solvent      = DMSO-D6
Creation Time = 11-NOV-2016 13:59:50
Revision Time = 21-NOV-2017 16:08:01
Current Time  = 21-NOV-2017 16:08:20

Comment      = single pulse
Data Format   = 1D COMPLEX
Dim Size     = 13107
Dim Title    = Proton
Dim Units    = [ppm]
Dimensions   = X
Site         = JNM-ECS400
Spectrometer = DELTA2_NMR

Field Strength = 9.389766[T] (400[MHz])
X Acq Duration = 2.18365952[s]
X Domain       = 1H
X Freq         = 399.78219838[MHz]
X Offset       = 5[ppm]
X Points      = 16384
X Prescans    = 1
X Resolution   = 0.45794685[Hz]
X Sweep       = 7.5030012[kHz]
X Sweep Clipped = 6.00240096[kHz]
Irr Domain    = Proton
Irr Freq      = 399.78219838[MHz]
Irr Offset    = 5[ppm]
Tri Domain    = Proton
Tri Freq      = 399.78219838[MHz]
Tri Offset    = 5[ppm]
Clipped       = FALSE
Scans         = 8
Total Scans   = 8

Relaxation Delay = 5[s]
Recvr Gain       = 34
Temp Get        = 20.2[dC]
X 90 Width      = 13.1[us]
X Acq Time      = 2.18365952[s]
X Angle         = 45[deg]
X Atn           = 2.2[dB]
X Pulse        = 6.55[us]
Irr Mode        = Off
Tri Mode        = Off
Dante Presat   = FALSE
Initial Wait    = 1[s]
Repetition Time = 7.18365952[s]
  
```

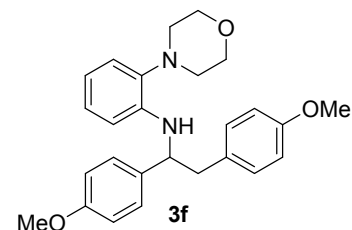



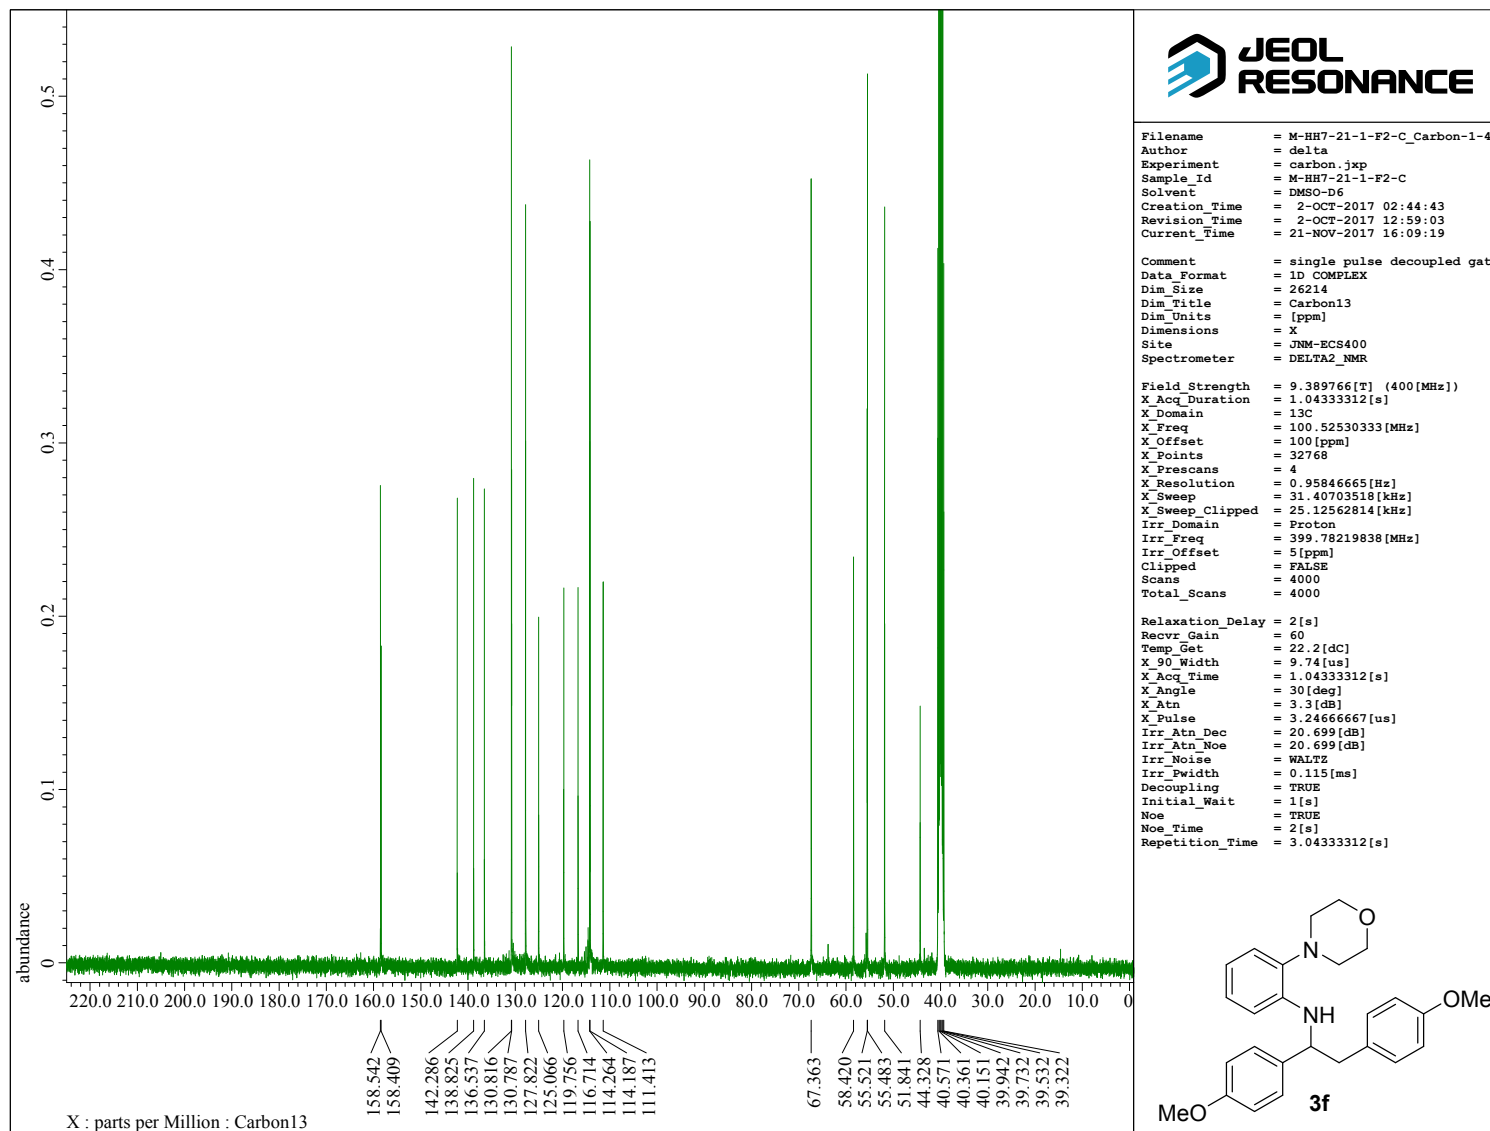

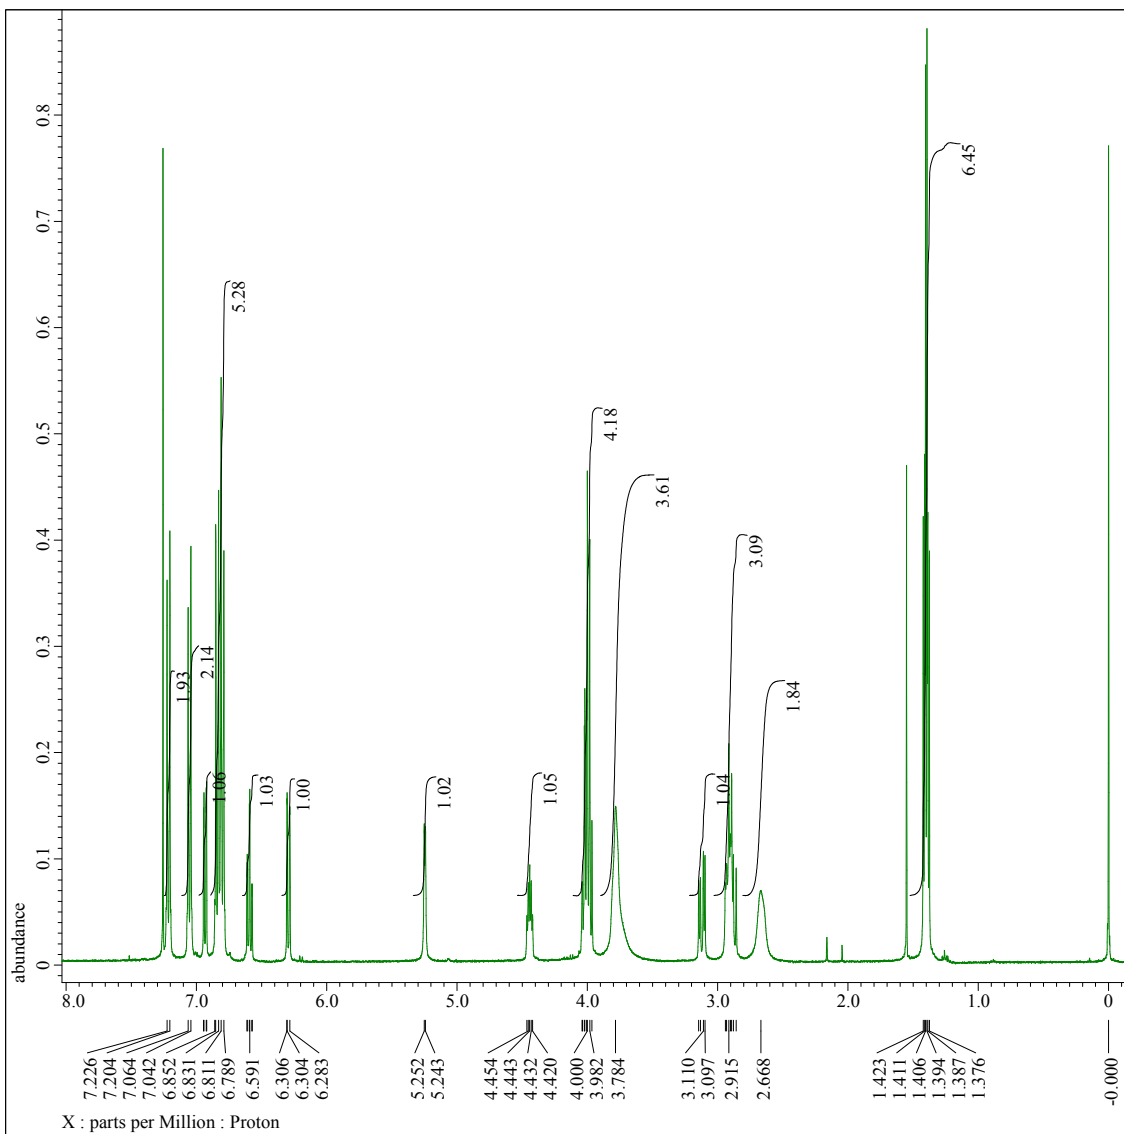

```

Filename      = M-HH7-21-5_Proton-1-6.jdf
Author       = delta
Experiment   = proton.jxp
Sample Id    = M-HH7-21-5
Solvent      = CHLOROFORM-D
Creation Time = 30-SEP-2017 11:24:41
Revision Time = 21-NOV-2017 16:12:55
Current Time  = 21-NOV-2017 16:13:07

Comment      = single_pulse
Data Format   = 1D_COMPLEX
Dim Size     = 13107
Dim Title    = Proton
Dim Units    = [ppm]
Dimensions   = X
Site         = JNM-ECS400
Spectrometer = DELTA2_NMR

Field Strength = 9.389766[T] (400[MHz])
X Acq Duration = 2.18365952[s]
X Domain       = 1H
X Freq         = 399.78219838[MHz]
X Offset       = 5[ppm]
X Points       = 16384
X Prescans     = 1
X Resolution   = 0.45794685[Hz]
X Sweep        = 7.5030012[kHz]
X Sweep Clipped = 6.00240096[kHz]
Irr Domain     = Proton
Irr Freq       = 399.78219838[MHz]
Irr Offset     = 5[ppm]
Tri Domain     = Proton
Tri Freq       = 399.78219838[MHz]
Tri Offset     = 5[ppm]
Clipped        = FALSE
Scans          = 8
Total Scans    = 8

Relaxation Delay = 5[s]
Recv Gain        = 34
Temp Get         = 22[dC]
X_90_Width      = 13.67[us]
X Acq Time       = 2.18365952[s]
X Angle          = 45[deg]
X Atn            = 2.2[db]
X Pulse         = 6.835[us]
Irr_Mode         = Off
Tri_Mode         = Off
Dante Presat    = FALSE
Initial Wait     = 1[s]
Repetition Time = 7.18365952[s]
  
```

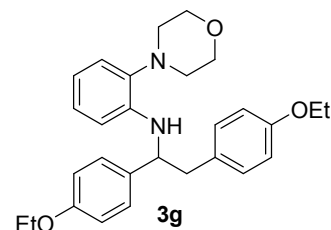

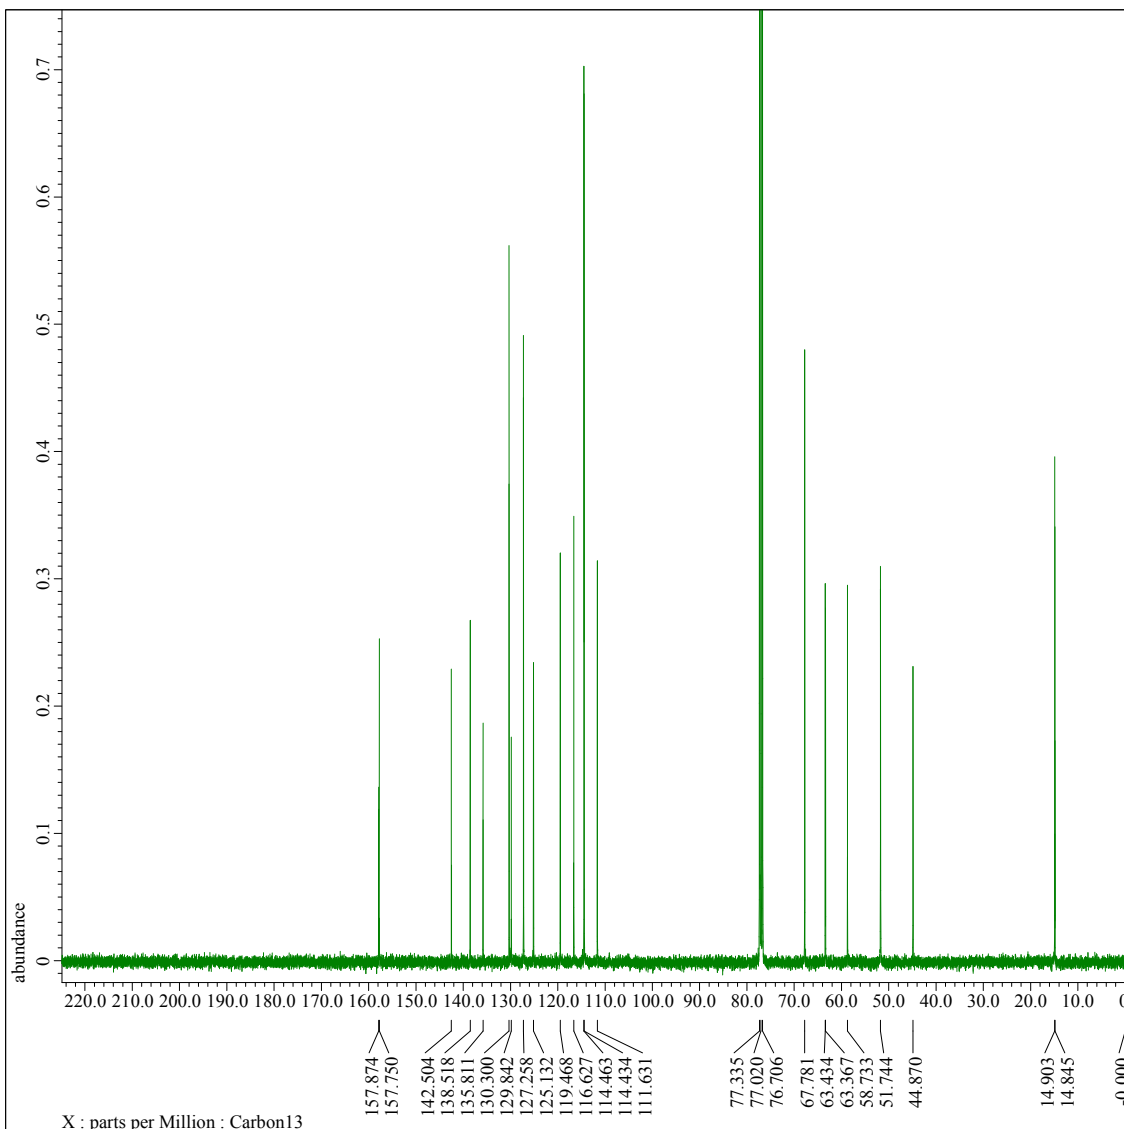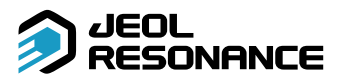

```

Filename      = M-HH7-21-5-C_Carbon-1-3.jd
Author       = delta
Experiment   = carbon.jxp
Sample Id    = M-HH7-21-5-C
Solvent      = CHLOROFORM-D
Creation Time = 1-OCT-2017 09:32:34
Revision Time = 2-OCT-2017 13:02:49
Current Time  = 21-NOV-2017 16:13:57

Comment      = single pulse decoupled gat
Data Format   = 1D COMPLEX
Dim Size     = 26214
Dim Title    = Carbon13
Dim Units    = [ppm]
Dimensions   = X
Site         = JNM-ECS400
Spectrometer = DELTA2_NMR

Field Strength = 9.389766[T] (400[MHz])
X Acq Duration = 1.04333312[s]
X Domain      = 13C
X Freq        = 100.52530333[MHz]
X Offset      = 100[ppm]
X Points      = 32768
X Freqscans   = 4
X Resolution  = 0.95846665[Hz]
X Sweep      = 31.40703518[kHz]
X Sweep Clipped = 25.12562814[kHz]
Irr Domain    = Proton
Irr Freq     = 399.78219838[MHz]
Irr Offset    = 5[ppm]
Clipped      = FALSE
Scans        = 3551
Total Scans  = 3551

Relaxation Delay = 2[s]
Recvr Gain      = 60
Temp Get       = 22.1[dC]
X 90 Width     = 9.74[us]
X Acq Time     = 1.04333312[s]
X Angle        = 30[deg]
X Atn          = 3.3[dB]
X Pulse        = 3.24666667[us]
Irr Atn Dec    = 20.699[dB]
Irr Atn Noe    = 20.699[dB]
Irr Noise      = WALTZ
Irr Pwidth     = 0.115[ms]
Decoupling     = TRUE
Initial Wait   = 1[s]
Noe            = TRUE
Noe Time       = 2[s]
Repetition Time = 3.04333312[s]
  
```

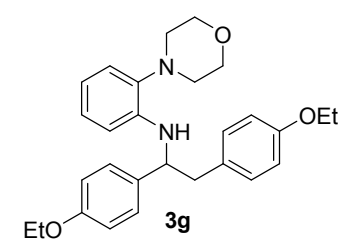

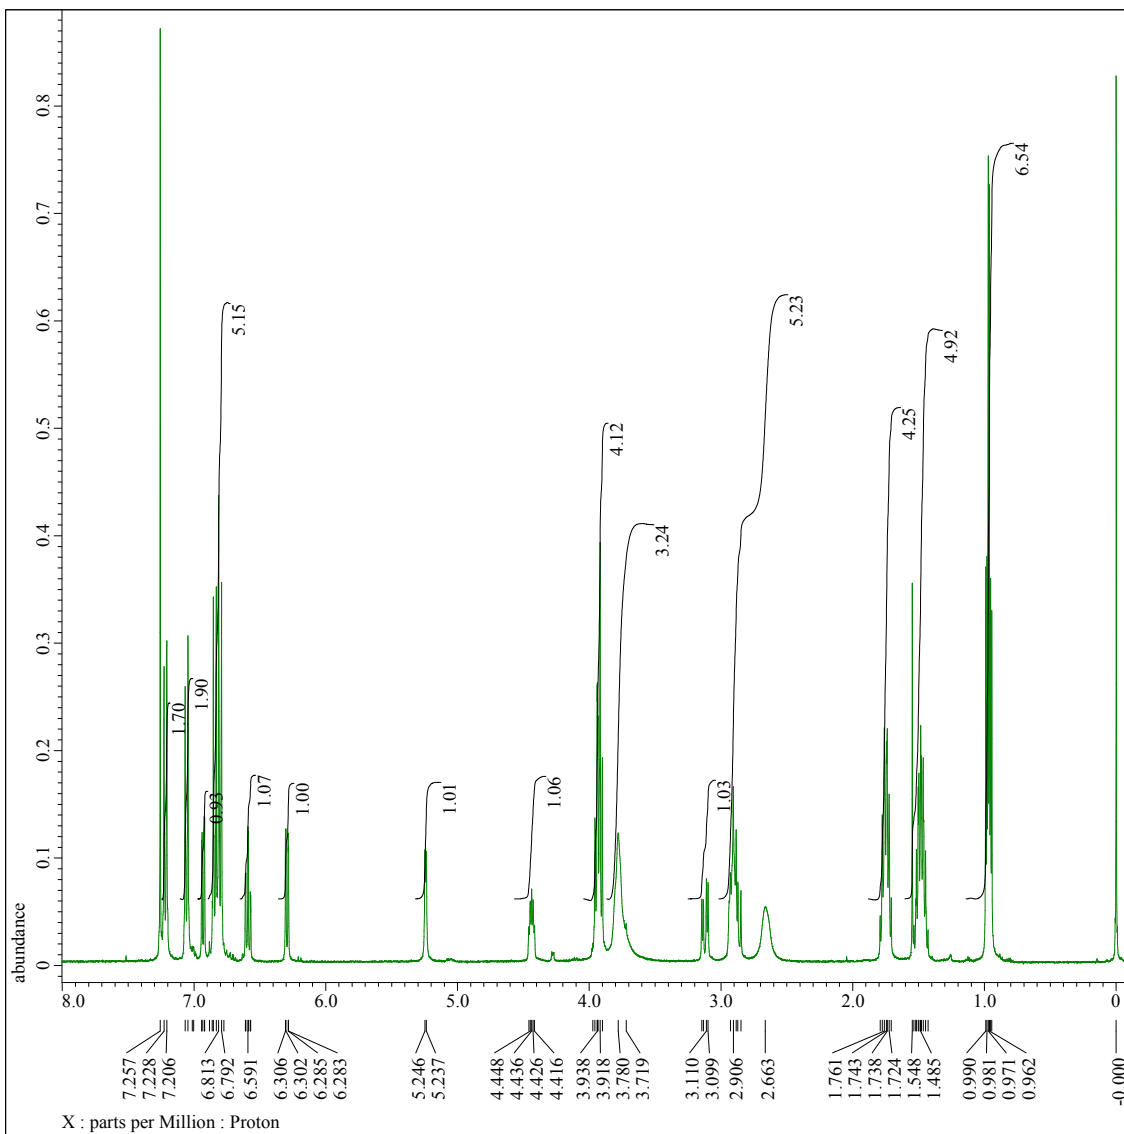

```

Filename      = M-HH7-89-5-nBu-di_Proton-1
Author       = delta
Experiment   = proton.jxp
Sample Id    = M-HH7-nBu-di
Solvent      = CHLOROFORM-D
Creation Time = 5-OCT-2017 09:30:32
Revision Time = 21-NOV-2017 16:16:22
Current Time  = 21-NOV-2017 16:16:38

Comment      = single_pulse
Data Format   = 1D_COMPLEX
Dim Size     = 13107
Dim Title    = Proton
Dim Units    = [ppm]
Dimensions   = X
Site         = JNM-ECS400
Spectrometer = DELTA2_NMR

Field Strength = 9.389766[T] (400[MHz])
X Acq_Duration = 2.18365952[s]
X Domain      = 1H
X Freq        = 399.78219838[MHz]
X_Offset      = 5[ppm]
X_Points      = 16384
X Prescans    = 1
X Resolution  = 0.45794685[Hz]
X Sweep      = 7.5030012[kHz]
X Sweep_Clip = 6.00240096[kHz]
Irr_Domain    = Proton
Irr_Freq      = 399.78219838[MHz]
Irr_Offset    = 5[ppm]
Tri_Domain    = Proton
Tri_Freq      = 399.78219838[MHz]
Tri_Offset    = 5[ppm]
Clipped       = FALSE
Scans         = 8
Total_Scans   = 8

Relaxation_Delay = 5[s]
Recvr Gain       = 34
Temp_Get         = 21.6[dC]
X_90_Width      = 13.67[us]
X Acq_Time       = 2.18365952[s]
X_Angle         = 45[deg]
X_Atn           = 2.2[dB]
X_Pulse         = 6.835[us]
Irr_Mode        = Off
Tri_Mode        = Off
Dante_Presat    = FALSE
Initial_Wait    = 1[s]
Repetition_Time = 7.18365952[s]
  
```

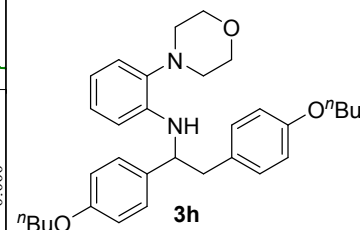

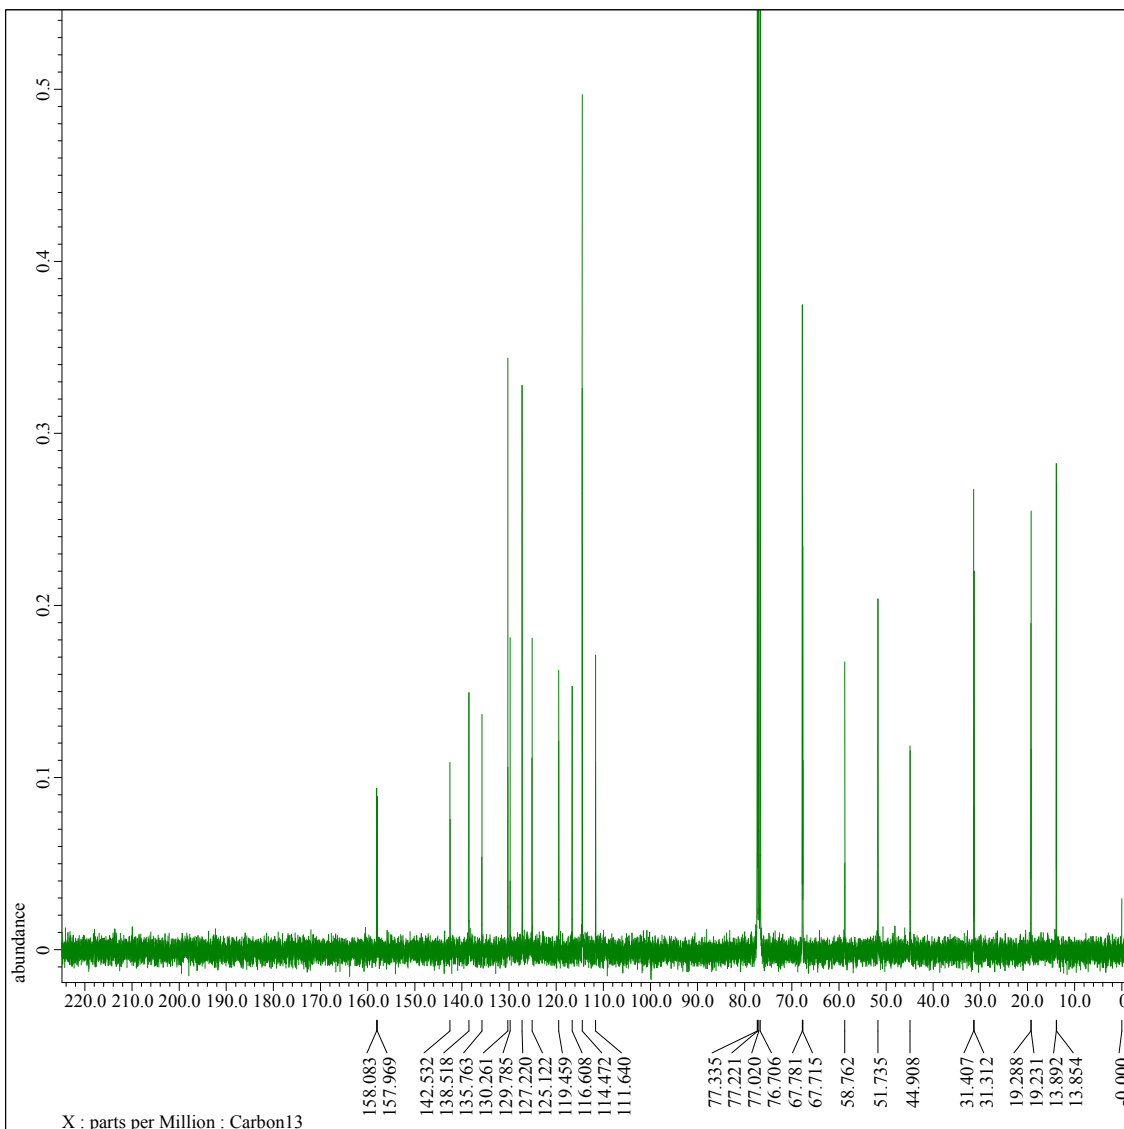

```

Filename      = M-HH7-89-5-C_Carbon-1-3.jd
Author       = delta
Experiment   = carbon.jxp
Sample Id    = M-HH7-89-5-C
Solvent      = CHLOROFORM-D
Creation_Time = 24-NOV-2017 09:19:18
Revision_Time = 24-NOV-2017 10:51:25
Current_Time  = 24-NOV-2017 10:52:00

Comment      = single pulse decoupled gat
Data Format   = 1D COMPLEX
Dim Size     = 26214
Dim Title    = Carbon13
Dim Units    = [ppm]
Dimensions   = X
Site         = JNM-ECS400
Spectrometer = DELTA2_NMR

Field Strength = 9.389766[T] (400[MHz])
X_Acq_Duration = 1.04333312[s]
X_Domain       = 13C
X_Freq         = 100.52530333[MHz]
X_Offset       = 100[ppm]
X_Points      = 32768
X_Frescans    = 4
X_Resolution   = 0.95846665[Hz]
X_Sweep       = 31.40703518[kHz]
X_Sweep_Clippped = 25.12562814[kHz]
Irr_Domain    = Proton
Irr_Freq      = 399.78219838[MHz]
Irr_Offset    = 5[ppm]
Clipped       = FALSE
Scans         = 1220
Total_Scans   = 1220

Relaxation_Delay = 2[s]
Recvr_Gain       = 60
Temp_Get        = 21.8[dC]
X_90_Width     = 9.74[us]
X_Acq_Time     = 1.04333312[s]
X_Angle        = 30[deg]
X_Atn          = 3.3[dB]
X_Pulse        = 3.24666667[us]
Irr_Atn_Dec    = 20.699[dB]
Irr_Atn_No     = 20.699[dB]
Irr_Noise      = WALTZ
Irr_Pwidth     = 0.115[ms]
Decoupling     = TRUE
Initial_Wait   = 1[s]
Noe            = TRUE
Noe_Time       = 2[s]
Repetition_Time = 3.04333312[s]
  
```

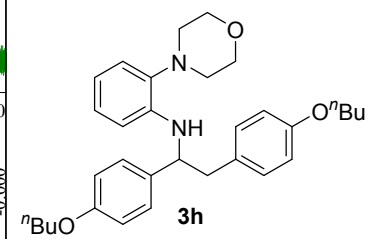

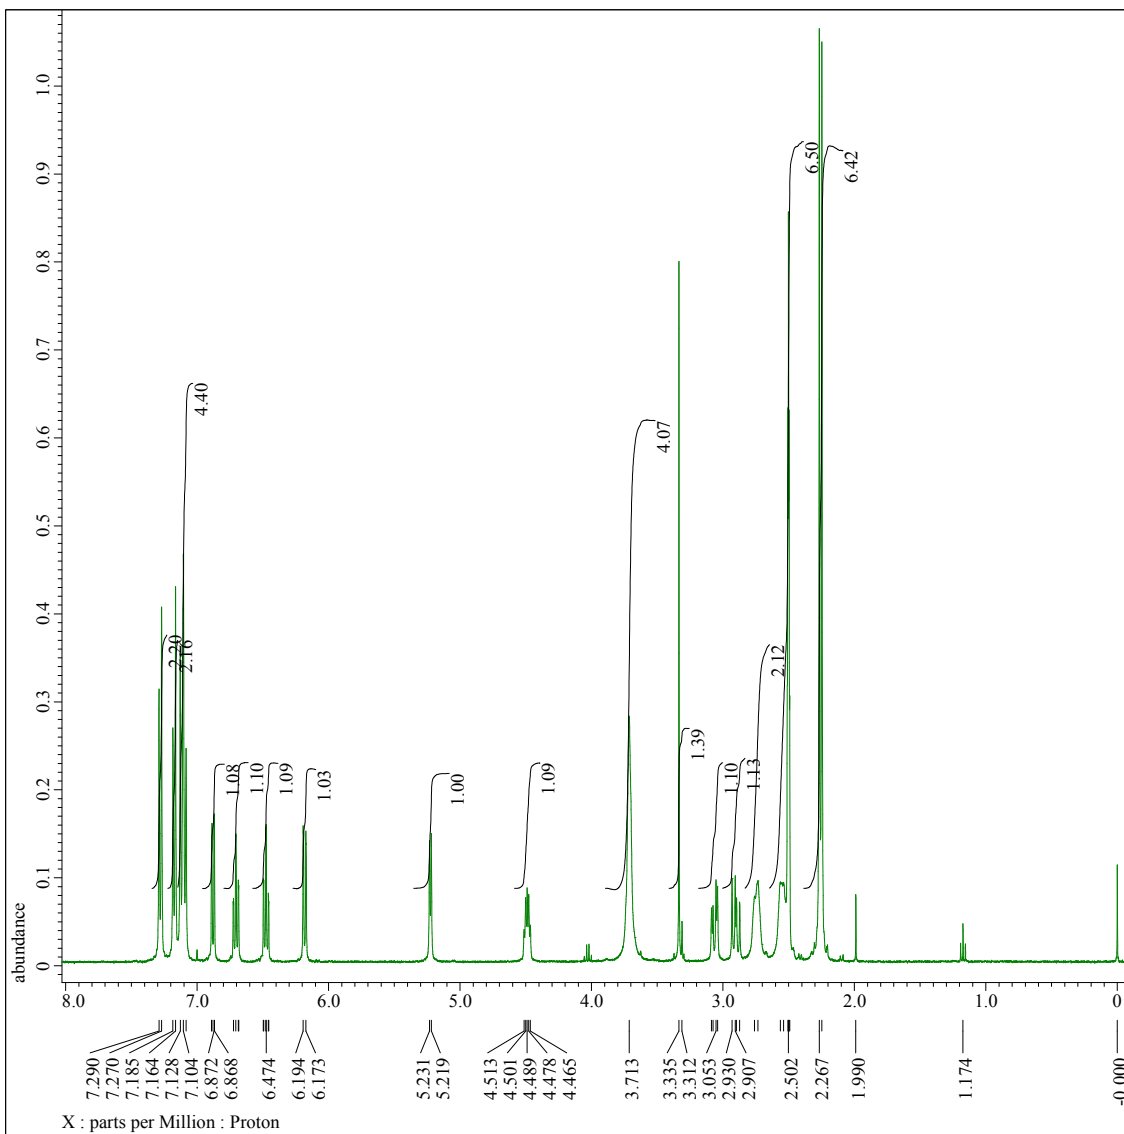

```

Filename      = M-HH7-21-3-F1_Proton-1-8.j
Author       = delta
Experiment   = proton.jxp
Sample Id    = M-HH6-21-3-F1
Solvent      = DMSO-D6
Creation Time = 11-NOV-2016 14:05:39
Revision Time = 22-NOV-2017 10:30:51
Current Time  = 22-NOV-2017 10:31:00

Comment      = single pulse
Data Format   = 1D COMPLEX
Dim Size     = 13107
Dim Title    = Proton
Dim Units    = [ppm]
Dimensions   = X
Site         = JNM-ECS400
Spectrometer = DELTA2_NMR

Field Strength = 9.389766[T] (400[MHz])
X Acq_Duration = 2.18365952[s]
X_Domain      = 1H
X_Freq        = 399.78219838[MHz]
X_Offset      = 5[ppm]
X_Points     = 16384
X_Prescans   = 1
X_Resolution = 0.45794685[Hz]
X_Sweep      = 7.5030012[kHz]
X_Sweep_Clip = 6.00240096[kHz]
Irr_Domain    = Proton
Irr_Freq     = 399.78219838[MHz]
Irr_Offset   = 5[ppm]
Tri_Domain    = Proton
Tri_Freq     = 399.78219838[MHz]
Tri_Offset   = 5[ppm]
Clipped      = FALSE
Scans        = 8
Total_Scans  = 8

Relaxation_Delay = 5[s]
Recvr Gain      = 36
Temp_Get        = 20.2[dC]
X_90_Width     = 13.1[us]
X_Acq_Time     = 2.18365952[s]
X_Angle        = 45[deg]
X_Atn          = 2.2[db]
X_Pulse        = 6.55[us]
Irr_Mode       = Off
Tri_Mode       = Off
Dante_Presat   = FALSE
Initial_Wait   = 1[s]
Repetition_Time = 7.18365952[s]

```

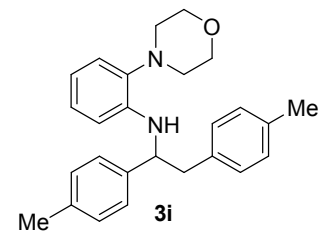

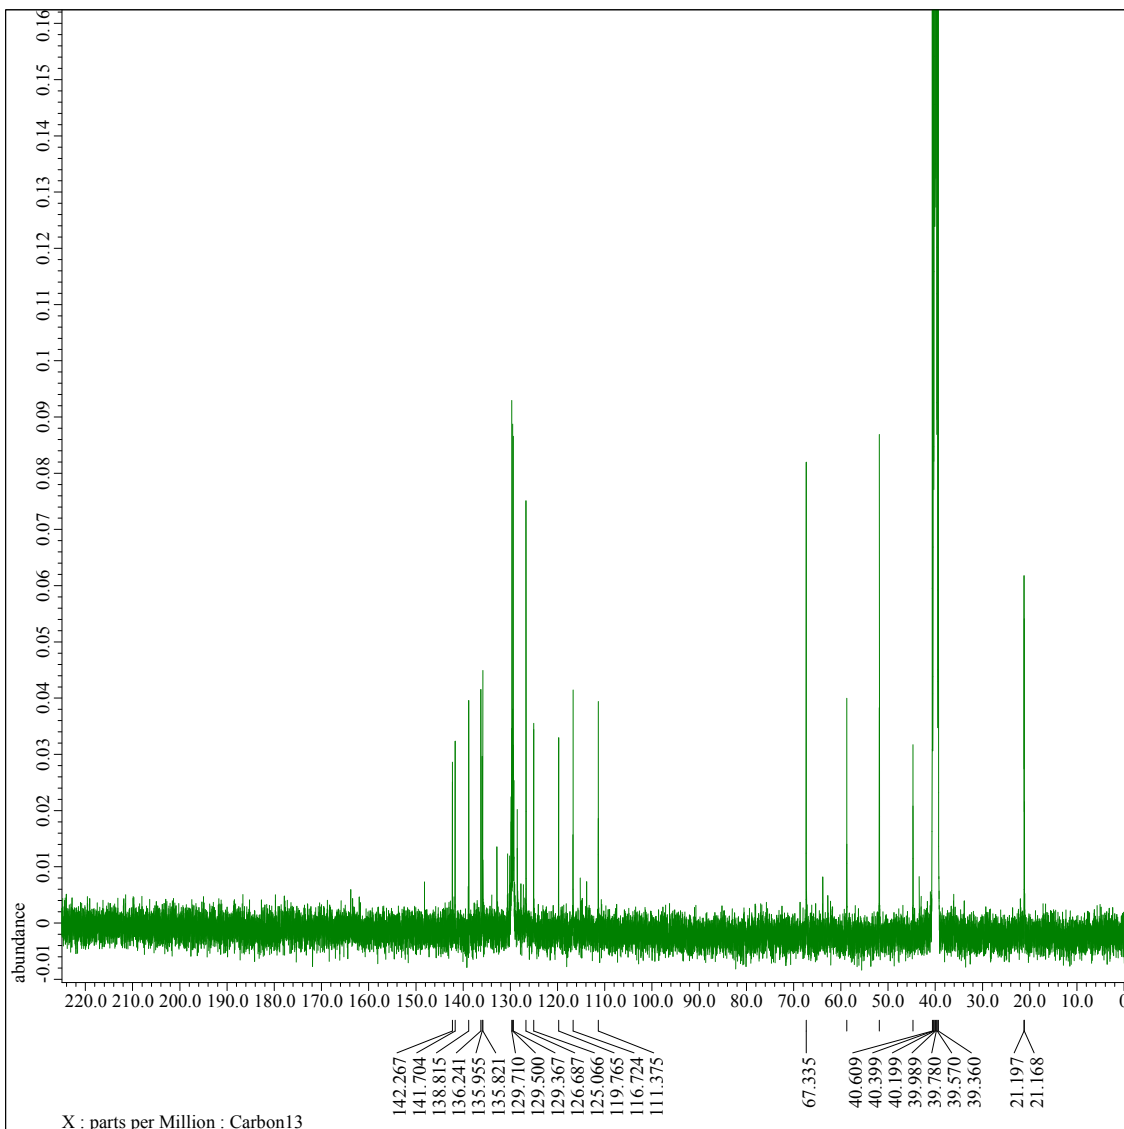

```

Filename      = M-HH7-21-3-F1_Carbon-1-4.j
Author       = delta
Experiment   = carbon.jxp
Sample Id    = M-HH7-21-3-F1
Solvent      = DMSO-D6
Creation_Time = 1-OCT-2017 00:57:50
Revision_Time = 22-NOV-2017 10:32:32
Current_Time = 22-NOV-2017 10:32:43

Comment      = single pulse decoupled gat
Data Format   = 1D COMPLEX
Dim Size     = 26214
Dim Title    = Carbon13
Dim Units    = [ppm]
Dimensions   = X
Site         = JNM-ECS400
Spectrometer = DELTA2_NMR

Field Strength = 9.389766[T] (400[MHz])
X_Acq_Duration = 1.04333312[s]
X_Domain      = 13C
X_Freq        = 100.52530333[MHz]
X_Offset      = 100 [ppm]
X_Points      = 32768
X_Prescans    = 4
X_Resolution  = 0.95846665[Hz]
X_Sweep       = 31.40703518[kHz]
X_Sweep_Clippped = 25.12562814[kHz]
Irr_Domain    = Proton
Irr_Freq      = 399.78219838[MHz]
Irr_Offset    = 5 [ppm]
Clipped       = FALSE
Scans         = 6000
Total_Scans   = 6000

Relaxation_Delay = 2[s]
Recvr_Gain       = 60
Temp_Get         = 22.1[dC]
X_90_Width      = 9.74[us]
X_Acq_Time      = 1.04333312[s]
X_Angle         = 30[deg]
X_Atn           = 3.3[dB]
X_Pulse         = 3.24666667[us]
Irr_Atn_Dec     = 20.699[dB]
Irr_Atn_Noise  = 20.699[dB]
Irr_Noise      = WALTZ
Irr_Pwidth      = 0.115[ms]
Decoupling      = TRUE
Initial_Wait    = 1[s]
Noe             = TRUE
Noe_Time        = 2[s]
Repetition_Time = 3.04333312[s]
  
```

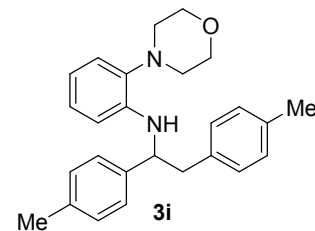

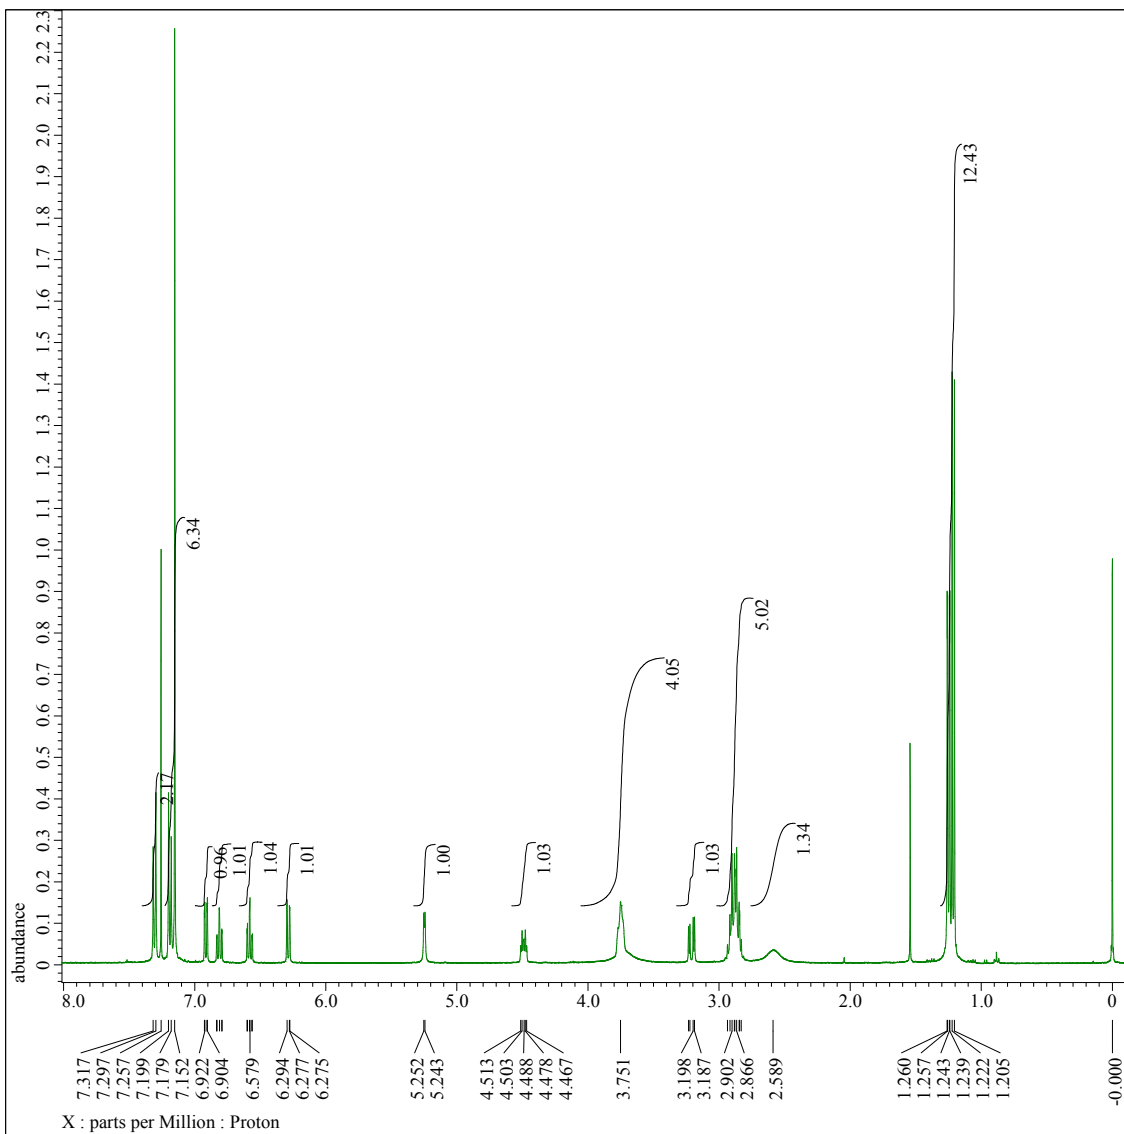

```

Filename      = M-HH7-28-2-iso_Proton-1-8.
Author       = delta
Experiment   = proton.jxp
Sample Id    = M-HH7-28-2-iso
Solvent      = CHLOROFORM-D
Creation Time = 22-SEP-2017 09:30:51
Revision Time = 22-NOV-2017 10:36:04
Current Time  = 22-NOV-2017 10:36:14

Comment      = single_pulse
Data Format   = 1D_COMPLEX
Dim Size     = 13107
Dim Title    = Proton
Dim Units    = [ppm]
Dimensions   = X
Site         = JNM-ECS400
Spectrometer = DELTA2_NMR

Field Strength = 9.389766[T] (400[MHz])
X_Acq_Duration = 2.18365952[s]
X_Domain       = 1H
X_Freq         = 399.78219838[MHz]
X_Offset       = 5[ppm]
X_Points       = 16384
X_Frescans     = 1
X_Resolution   = 0.45794685[Hz]
X_Sweep        = 7.5030012[kHz]
X_Sweep_Clippped = 6.00240096[kHz]
Irr_Domain     = Proton
Irr_Freq       = 399.78219838[MHz]
Irr_Offset     = 5[ppm]
Tri_Domain     = Proton
Tri_Freq       = 399.78219838[MHz]
Tri_Offset     = 5[ppm]
Clipped        = FALSE
Scans          = 8
Total_Scans    = 8

Relaxation_Delay = 5[s]
Recvr Gain       = 36
Temp_Get         = 21.9[dC]
X_90_Width       = 13.67[us]
X_Acq_Time       = 2.18365952[s]
X_Angle          = 45[deg]
X_Atn            = 2.2[dB]
X_Pulse          = 6.835[us]
Irr_Mode         = Off
Tri_Mode         = Off
Dante_Presat     = FALSE
Initial_Wait     = 1[s]
Repetition_Time  = 7.18365952[s]

```

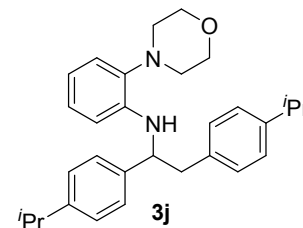



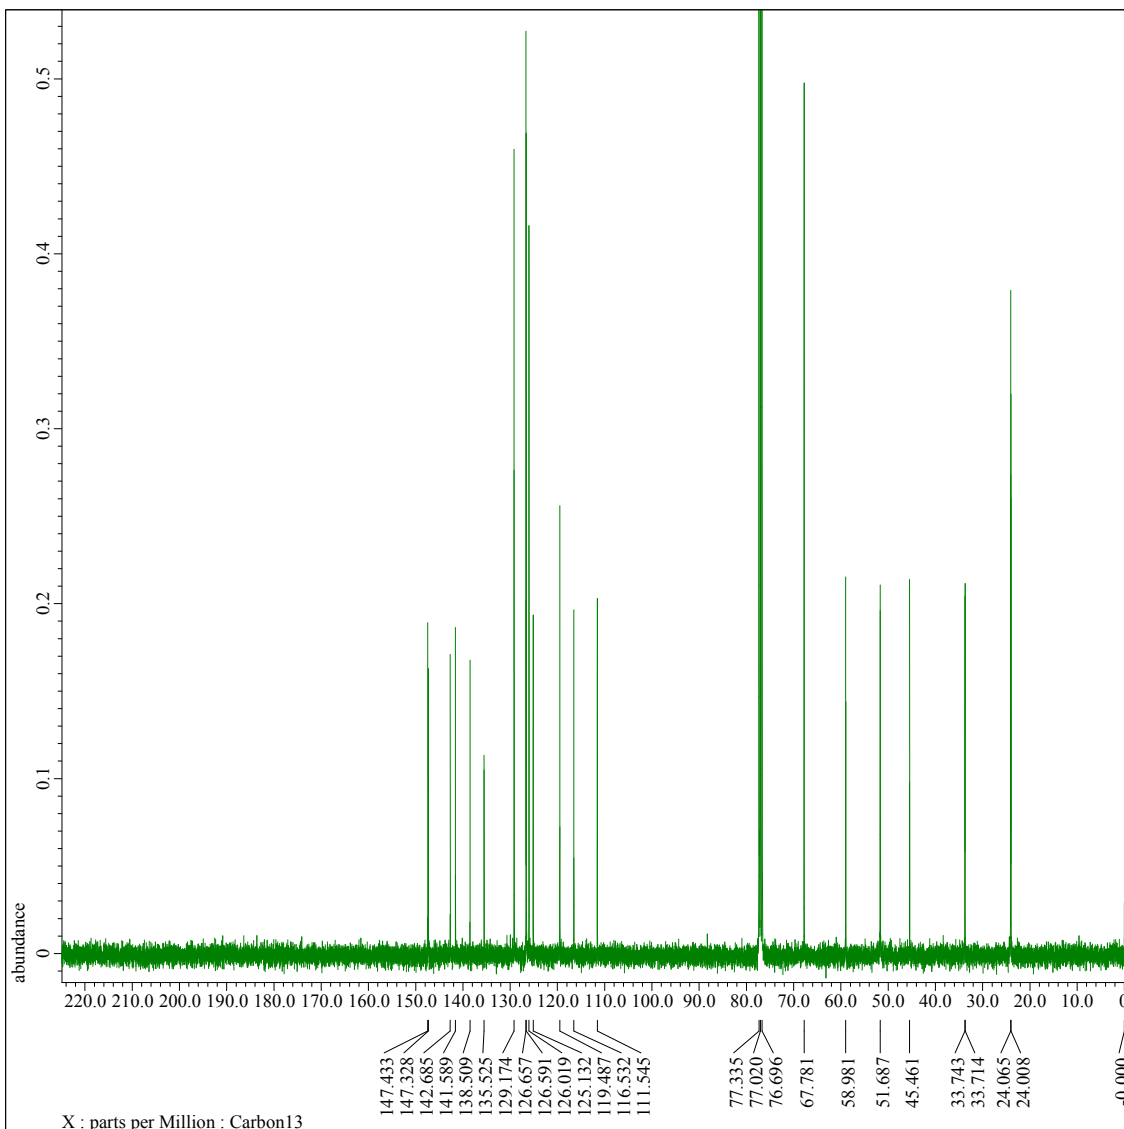

```

Filename      = M-HH7-28-2-C_Carbon-1-4.jd
Author       = delta
Experiment   = carbon.jxp
Sample Id    = M-HH7-28-2-C
Solvent      = CHLOROFORM-D
Creation Time = 30-SEP-2017 16:55:08
Revision Time = 2-OCT-2017 13:04:46
Current Time  = 22-NOV-2017 10:38:14

Comment      = single pulse decoupled gat
Data Format   = 1D COMPLEX
Dim Size     = 26214
Dim Title    = Carbon13
Dim Units    = [ppm]
Dimensions   = X
Site         = JNM-ECS400
Spectrometer = DELTA2_NMR

Field Strength = 9.389766[T] (400[MHz])
X Acq_Duration = 1.04333312[s]
X_Domain      = 13C
X_Freq        = 100.52530333[MHz]
X_Offset      = 100[ppm]
X_Points      = 32768
X_Frescans    = 4
X_Resolution  = 0.95846665[Hz]
X_Sweep       = 31.40703518[kHz]
X_Sweep_Clippped = 25.12562814[kHz]
Irr_Domain    = Proton
Irr_Freq      = 399.78219838[MHz]
Irr_Offset    = 5[ppm]
Clipped       = FALSE
Scans         = 2048
Total_Scans   = 2048

Relaxation_Delay = 2[s]
Recvr_Gain       = 60
Temp_Get         = 22.3[dC]
X_90_Width      = 9.74[us]
X_Acq_Time      = 1.04333312[s]
X_Angle         = 30[deg]
X_Atn           = 3.3[dB]
X_Pulse         = 3.24666667[us]
Irr_Atn_Dec     = 20.699[dB]
Irr_Atn_No     = 20.699[dB]
Irr_Noise       = WALTZ
Irr_Pwidth      = 0.115[ms]
Decoupling      = TRUE
Initial_Wait    = 1[s]
Noe             = TRUE
Noe_Time        = 2[s]
Repetition_Time = 3.04333312[s]
  
```

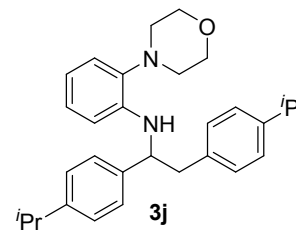

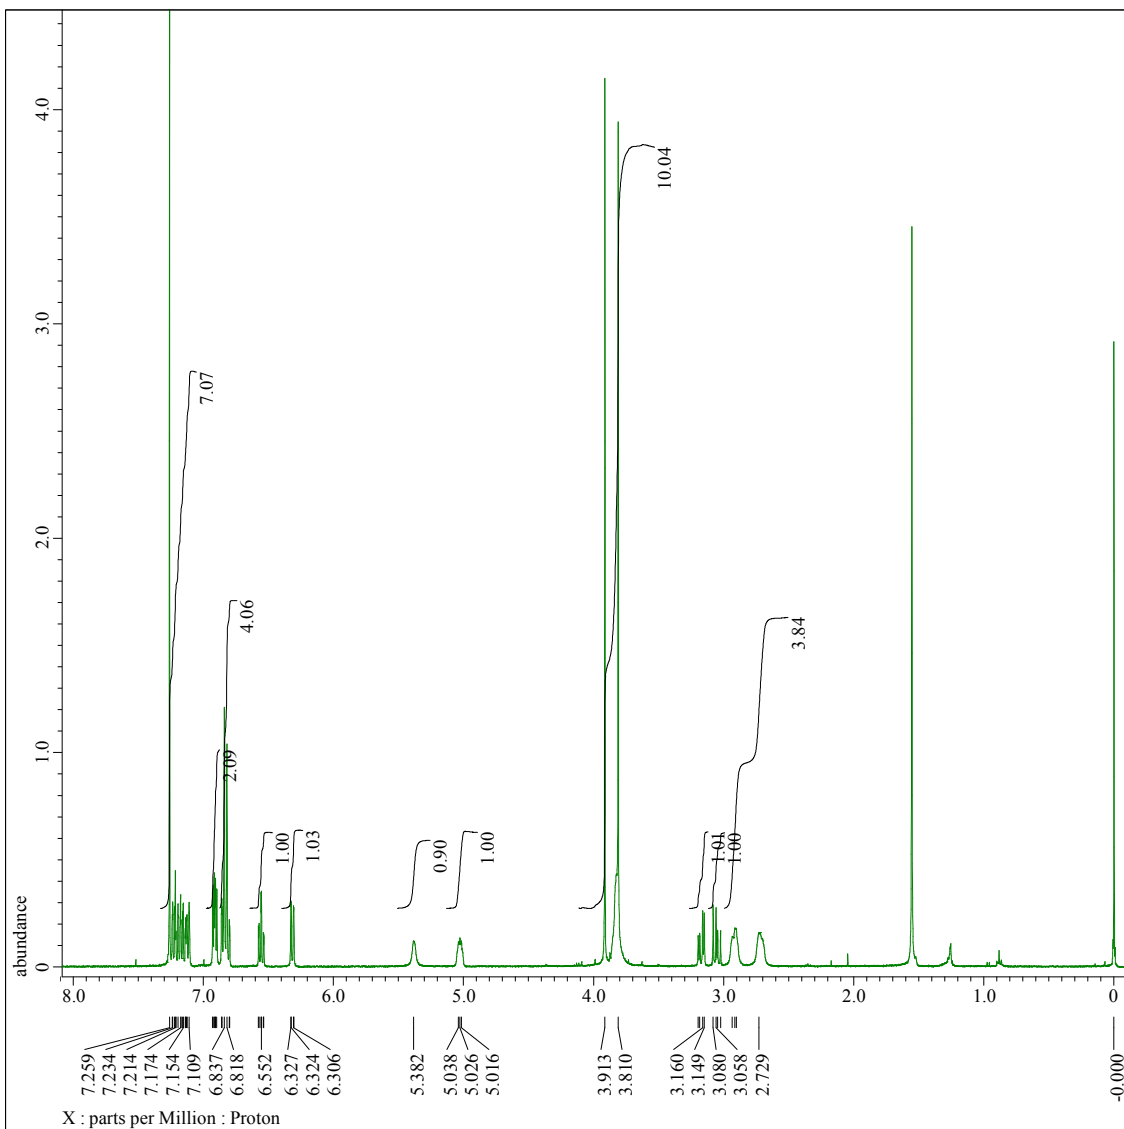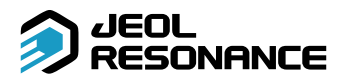

```

Filename      = M-HH7-28-4-F3-re_Proton-1-
Author       = delta
Experiment    = proton.jxp
Sample Id    = M-HH7-28-4-F3-re
Solvent      = CHLOROFORM-D
Creation Time = 29-NOV-2017 11:43:15
Revision Time = 29-NOV-2017 12:28:20
Current Time  = 29-NOV-2017 12:28:42

Comment      = single_pulse
Data Format   = 1D_COMPLEX
Dim Size     = 13107
Dim Title    = Proton
Dim Units    = [ppm]
Dimensions   = X
Site        = JNM-ECS400
Spectrometer = DELTA2_NMR

Field Strength = 9.389766[T] (400[MHz])
X_Acq_Duration = 2.18365952[s]
X_Domain      = 1H
X_Freq       = 399.78219838[MHz]
X_Offset     = 5[ppm]
X_Points     = 16384
X_Prescans   = 1
X_Resolution = 0.45794685[Hz]
X_Sweep      = 7.5030012[kHz]
X_Sweep_Clip = 6.00240096[kHz]
Irr_Domain   = Proton
Irr_Freq     = 399.78219838[MHz]
Irr_Offset   = 5[ppm]
Tri_Domain   = Proton
Tri_Freq     = 399.78219838[MHz]
Tri_Offset   = 5[ppm]
Clipped      = FALSE
Scans        = 8
Total_Scans  = 8

Relaxation_Delay = 5[s]
Recvr_Gain       = 46
Temp_Get         = 21.5[degC]
X_90_Width      = 11.69[us]
X_Acq_Time      = 2.18365952[s]
X_Angle         = 45[deg]
X_Atn           = 1.5[dB]
X_Pulse         = 5.845[us]
Irr_Mode        = Off
Tri_Mode        = Off
Dante_Presat    = FALSE
Initial_Wait    = 1[s]
Repetition_Time = 7.18365952[s]
  
```

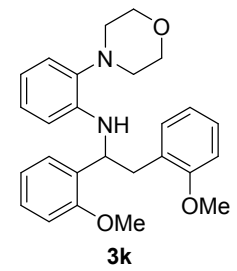

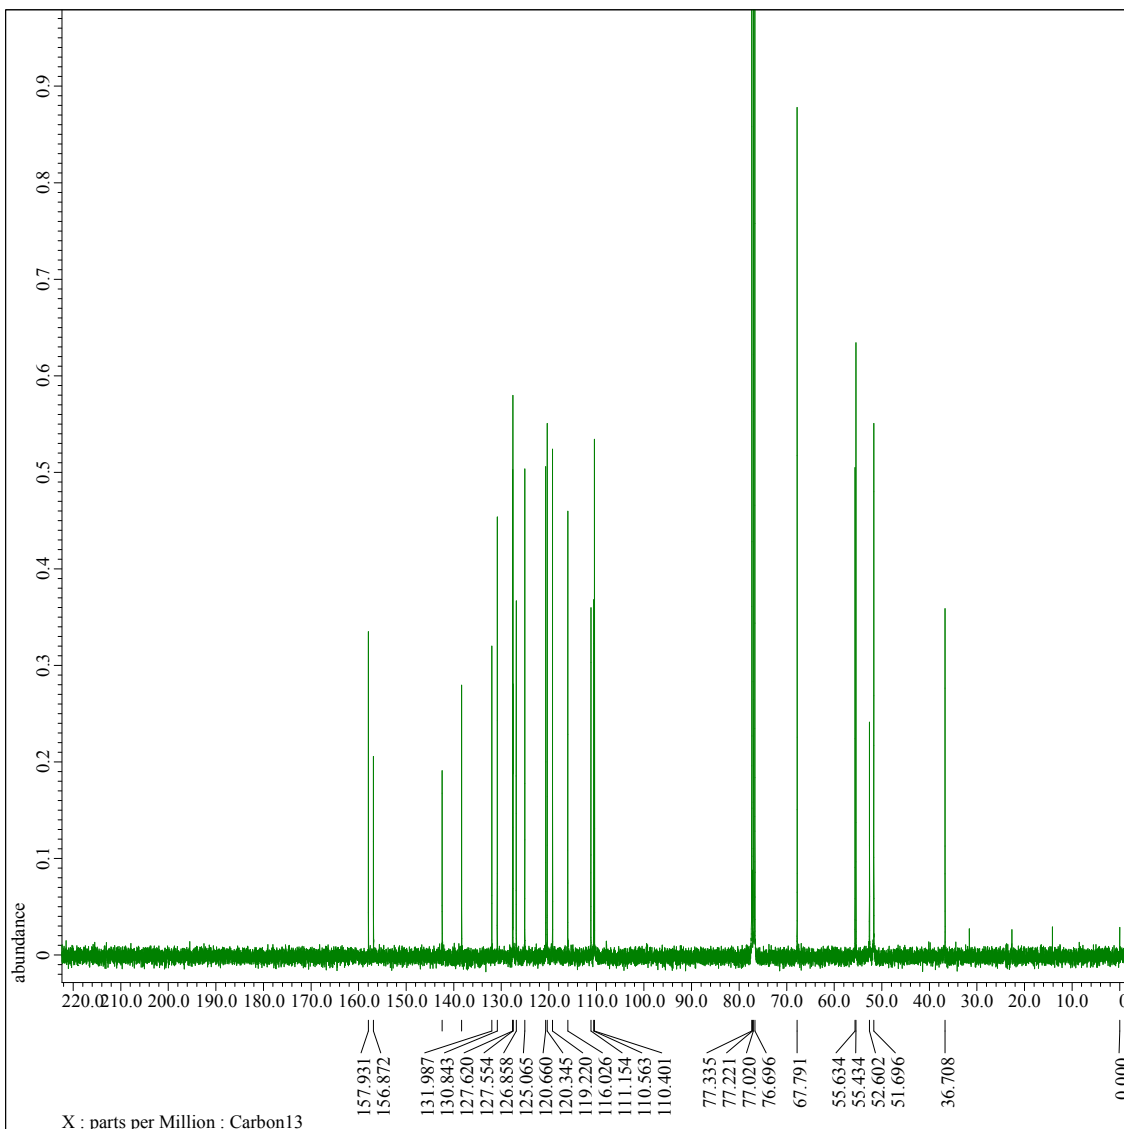

X : parts per Million : Carbon13

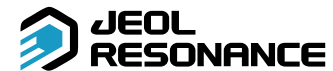

```

Filename      = M-HH7-28-4-F3-C_Carbon-1-4
Author       = delta
Experiment   = carbon.jxp
Sample Id    = M-HH7-28-4-F3-C
Solvent      = CHLOROFORM-D
Creation Time = 29-NOV-2017 14:10:13
Revision Time = 29-NOV-2017 15:48:11
Current Time  = 29-NOV-2017 15:48:44

Comment      = single pulse decoupled gat
Data Format   = 1D COMPLEX
Dim Size     = 26214
Dim Title    = Carbon13
Dim Units    = [ppm]
Dimensions   = X
Site         = JNM-ECS400
Spectrometer = DELTA2_NMR

Field Strength = 9.389766[T] (400[MHz])
X Acq Duration = 1.04333312[s]
X Domain      = 13C
X Freq        = 100.52530333[MHz]
X Offset      = 100 [ppm]
X Points      = 32768
X Prescans    = 4
X Resolution  = 0.95846665[Hz]
X Sweep       = 31.40703518[kHz]
X Sweep Clipped = 25.12562814[kHz]
Irr Domain    = Proton
Irr Freq      = 399.78219838[MHz]
Irr Offset    = 5 [ppm]
Clipped       = FALSE
Scans         = 1024
Total Scans   = 1024

Relaxation Delay = 2[s]
Recvr Gain      = 60
Temp Get        = 22[dc]
X 90 Width     = 9.36[us]
X Acq Time     = 1.04333312[s]
X Angle        = 30[deg]
X Atn          = 3.3[db]
X Pulse        = 3.12[us]
Irr Atn Dec    = 20.394[db]
Irr Atn Noe    = 20.394[db]
Irr Noise      = WALTZ
Irr Pwidth     = 0.115[ms]
Decoupling     = TRUE
Initial Wait   = 1[s]
Noe            = TRUE
Noe Time       = 2[s]
Repetition Time = 3.04333312[s]
  
```

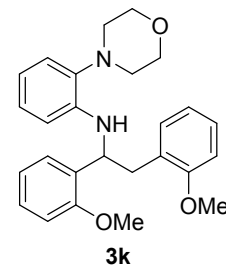

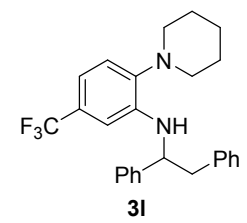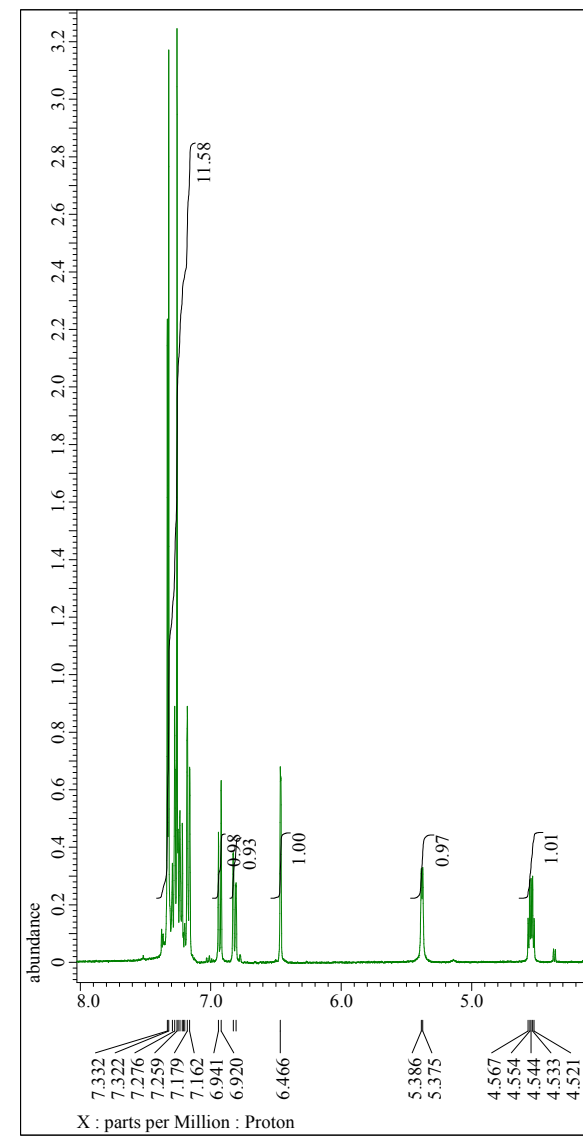

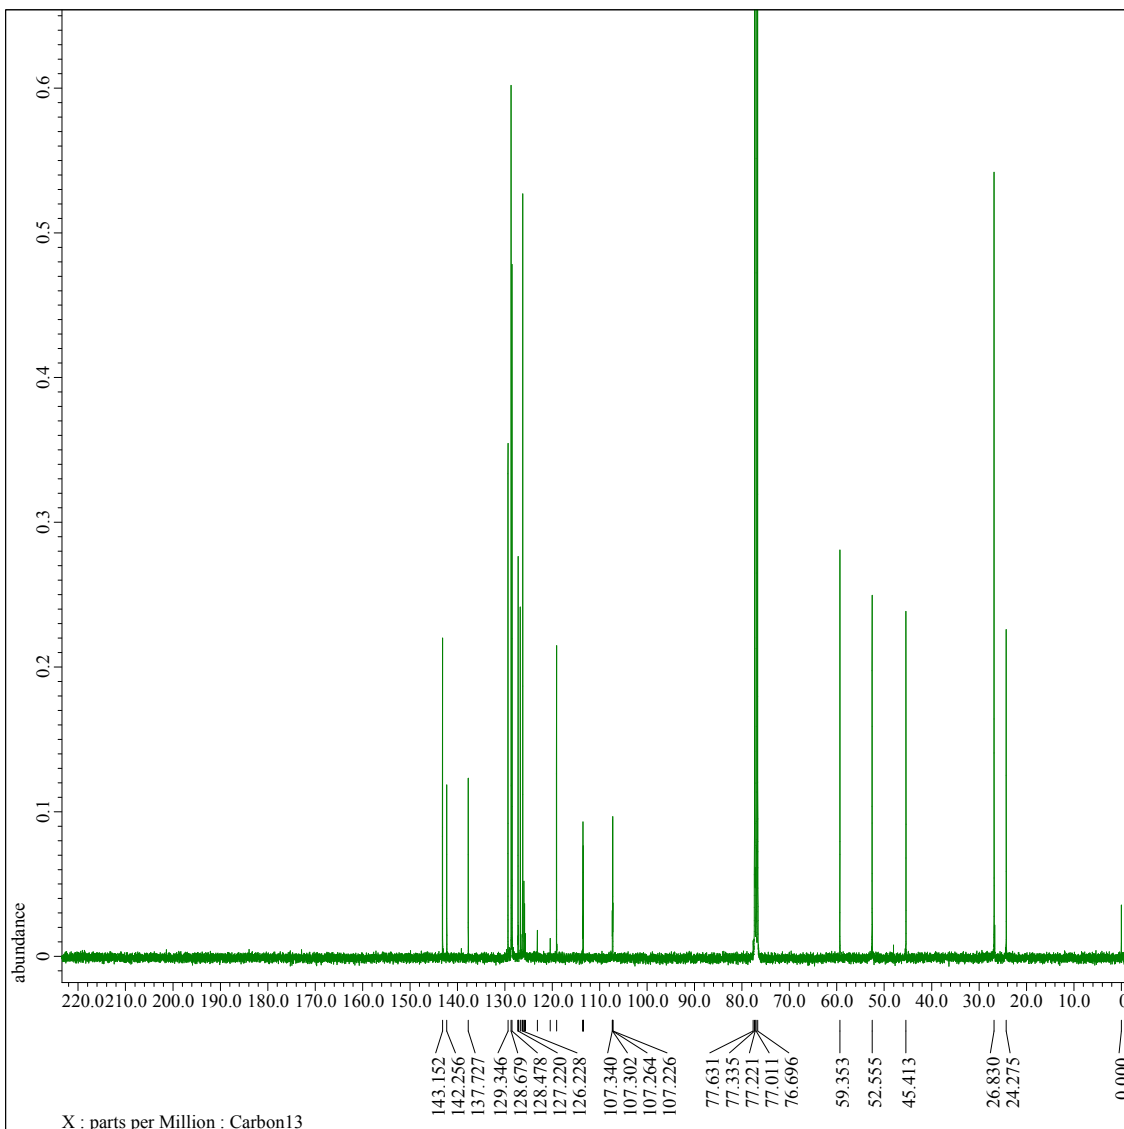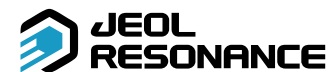

```

Filename      = M-HH7-47-1-F1_Carbon-1-5.j
Author       = delta
Experiment   = carbon.jxp
Sample Id    = M-HH7-47-1-F1
Solvent      = CHLOROFORM-D
Creation_Time = 26-SEP-2017 16:40:19
Revision_Time = 22-NOV-2017 11:24:51
Current_Time = 22-NOV-2017 11:25:22

Comment      = single pulse decoupled gat
Data Format   = 1D COMPLEX
Dim Size     = 26214
Dim Title    = Carbon13
Dim Units    = [ppm]
Dimensions   = X
Site         = JNM-ECS400
Spectrometer = DELTA2_NMR

Field Strength = 9.389766[T] (400[MHz])
X_Acq_Duration = 1.04333312[s]
X_Domain      = 13C
X_Freq        = 100.52530333[MHz]
X_Offset      = 100[ppm]
X_Points     = 32768
X_Prescans   = 4
X_Resolution = 0.95846665[Hz]
X_Sweep      = 31.40703518[kHz]
X_Sweep_Clipped = 25.12562814[kHz]
Irr_Domain    = Proton
Irr_Freq      = 399.78219838[MHz]
Irr_Offset    = 5[ppm]
Clipped      = FALSE
Scans        = 8000
Total_Scans   = 8000

Relaxation_Delay = 2[s]
Recvr_Gain       = 60
Temp_Get         = 22.4[dC]
X_90_Width      = 9.74[us]
X_Acq_Time      = 1.04333312[s]
X_Angle         = 30[deg]
X_Atn           = 3.3[dB]
X_Pulse         = 3.24666667[us]
Irr_Atn_Dec     = 20.699[dB]
Irr_Atn_No     = 20.699[dB]
Irr_Noise      = WALTZ
Irr_Pwidth     = 0.115[ms]
Decoupling     = TRUE
Initial_Wait   = 1[s]
Noe            = TRUE
Noe_Time       = 2[s]
Repetition_Time = 3.04333312[s]
  
```

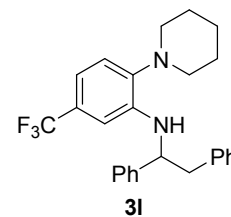

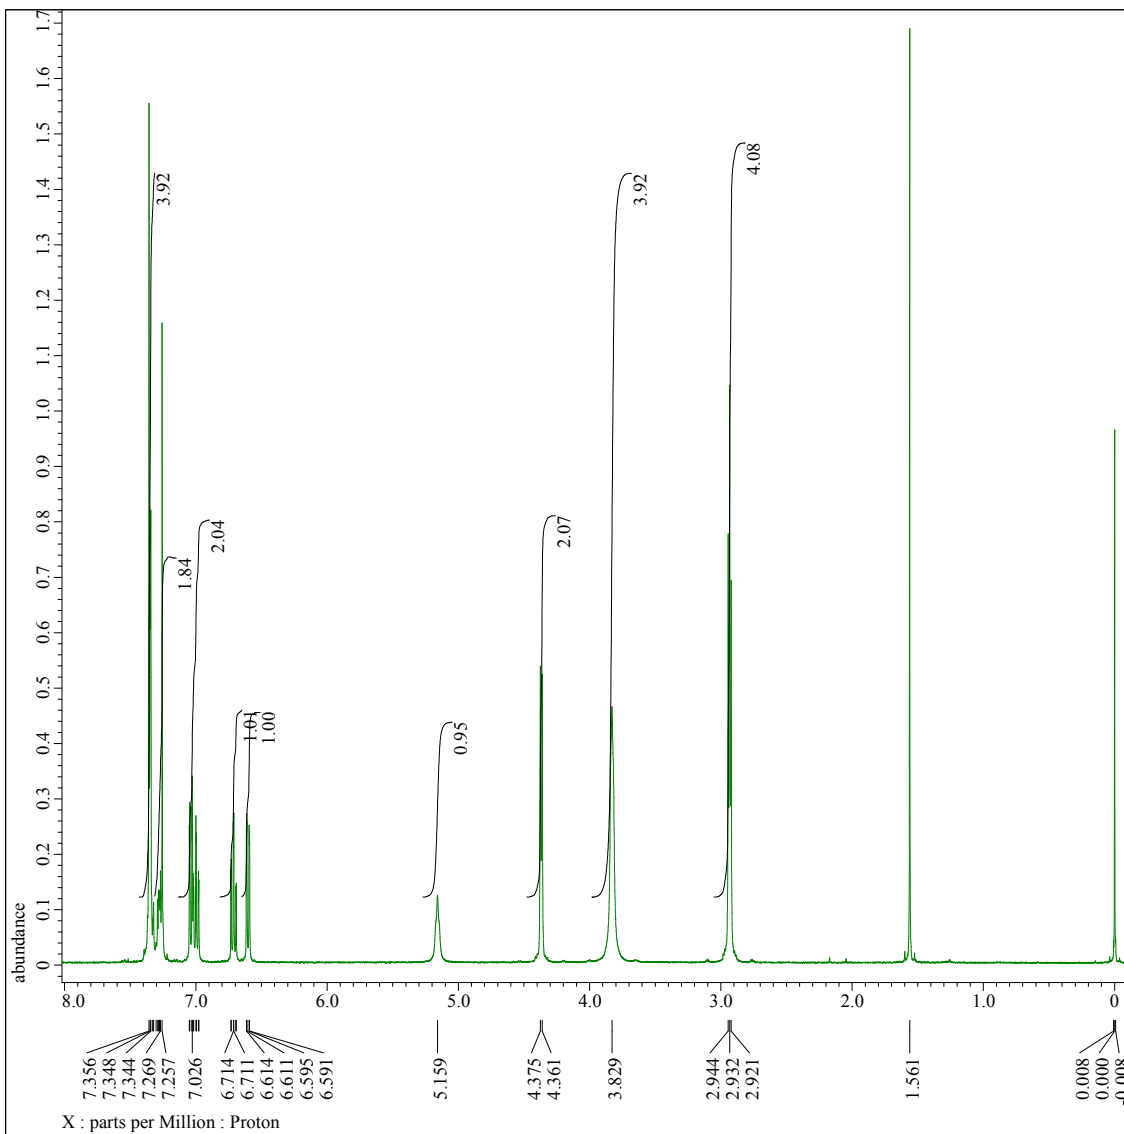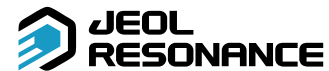

```

Filename      = M-HH7-30_Proton-1-5.jdf
Author       = delta
Experiment   = proton.jxp
Sample Id    = M-HH7-30
Solvent      = CHLOROFORM-D
Creation Time = 22-NOV-2016 13:20:51
Revision Time = 1-DEC-2017 12:58:12
Current Time  = 1-DEC-2017 12:58:18

Comment      = single_pulse
Data Format   = 1D_COMPLEX
Dim Size     = 13107
Dim Title    = Proton
Dim Units    = [ppm]
Dimensions   = X
Site         = JNM-ECS400
Spectrometer = DELTA2_NMR

Field Strength = 9.389766[T] (400[MHz])
X Acq Duration = 2.18365952[s]
X Domain       = 1H
X Freq         = 399.78219838[MHz]
X Offset       = 5[ppm]
X Points       = 16384
X Fscans       = 1
X Resolution   = 0.45794685[Hz]
X Sweep        = 7.5030012[kHz]
X Sweep Clipped = 6.00240096[kHz]
Irr Domain    = Proton
Irr Freq      = 399.78219838[MHz]
Irr Offset    = 5[ppm]
Tri Domain    = Proton
Tri Freq      = 399.78219838[MHz]
Tri Offset    = 5[ppm]
Clipped       = FALSE
Scans         = 8
Total Scans   = 8

Relaxation_Delay = 5[s]
Recv Gain        = 36
Temp Get         = 21.6[dC]
X 90 Width       = 13.1[us]
X Acq Time       = 2.18365952[s]
X Angle          = 45[deg]
X Atn            = 2.2[db]
X Pulse          = 6.55[us]
Irr Mode         = Off
Tri Mode         = Off
Dante Presat    = FALSE
Initial Wait     = 1[s]
Repetition Time = 7.18365952[s]

```

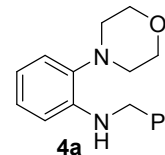

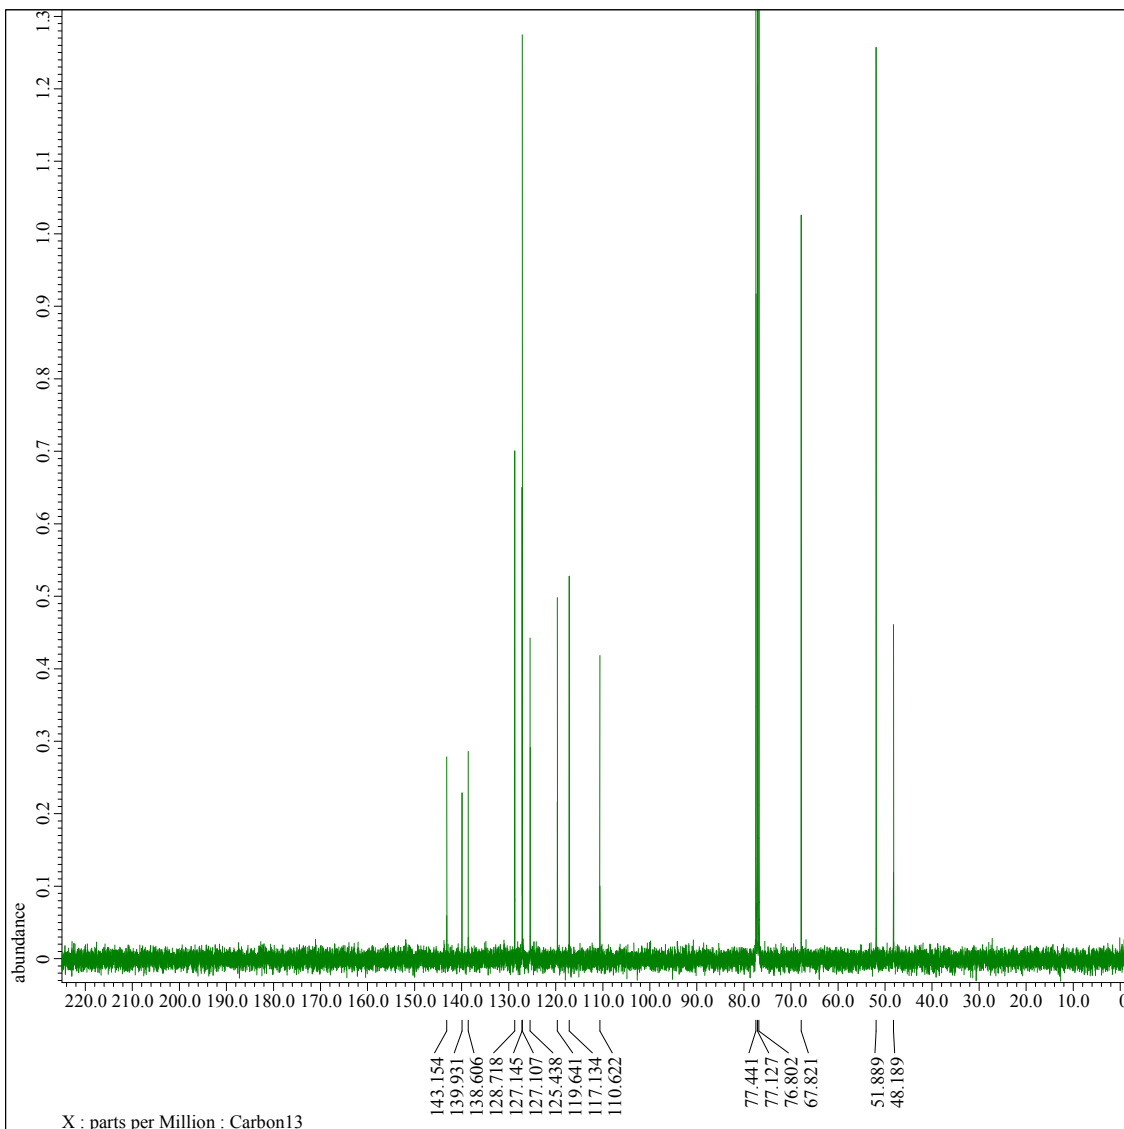

X : parts per Million : Carbon13



```

Filename      = M-HH7-30-C_Carbon-1-2.jdf
Author       = delta
Experiment   = carbon.jxp
Sample Id    = M-HH7-30-C
Solvent      = CHLOROFORM-D
Creation Time = 24-NOV-2017 10:28:32
Revision Time = 24-NOV-2017 10:49:51
Current Time  = 24-NOV-2017 10:50:13

Comment      = single pulse decoupled gat
Data Format   = 1D COMPLEX
Dim Size     = 26214
Dim Title    = Carbon13
Dim Units    = [ppm]
Dimensions   = X
Site         = JNM-ECS400
Spectrometer = DELTA2_NMR

Field Strength = 9.389766[T] (400[MHz])
X_Acq_Duration = 1.04333312[s]
X_Domain       = 13C
X_Freq         = 100.52530333[MHz]
X_Offset       = 100[ppm]
X_Points       = 32768
X_Prescans     = 4
X_Resolution   = 0.95846665[Hz]
X_Sweep        = 31.40703518[kHz]
X_Sweep_Clippped = 25.12562814[kHz]
Irr_Domain     = Proton
Irr_Freq       = 399.78219838[MHz]
Irr_Offset     = 5[ppm]
Clipped        = FALSE
Scans          = 352
Total_Scans    = 352

Relaxation_Delay = 2[s]
Recvr_Gain       = 60
Temp_Get         = 21.9[dC]
X_90_Width      = 9.74[us]
X_Acq_Time      = 1.04333312[s]
X_Angle         = 30[deg]
X_Atn           = 3.3[dB]
X_Pulse         = 3.24666667[us]
Irr_Atn_Dec     = 20.699[dB]
Irr_Atn_No     = 20.699[dB]
Irr_Noise       = WALTZ
Irr_Pwidth      = 0.115[ms]
Decoupling      = TRUE
Initial_Wait    = 1[s]
Noe             = TRUE
Noe_Time        = 2[s]
Repetition_Time = 3.04333312[s]
  
```

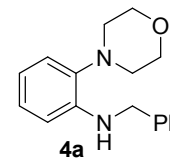

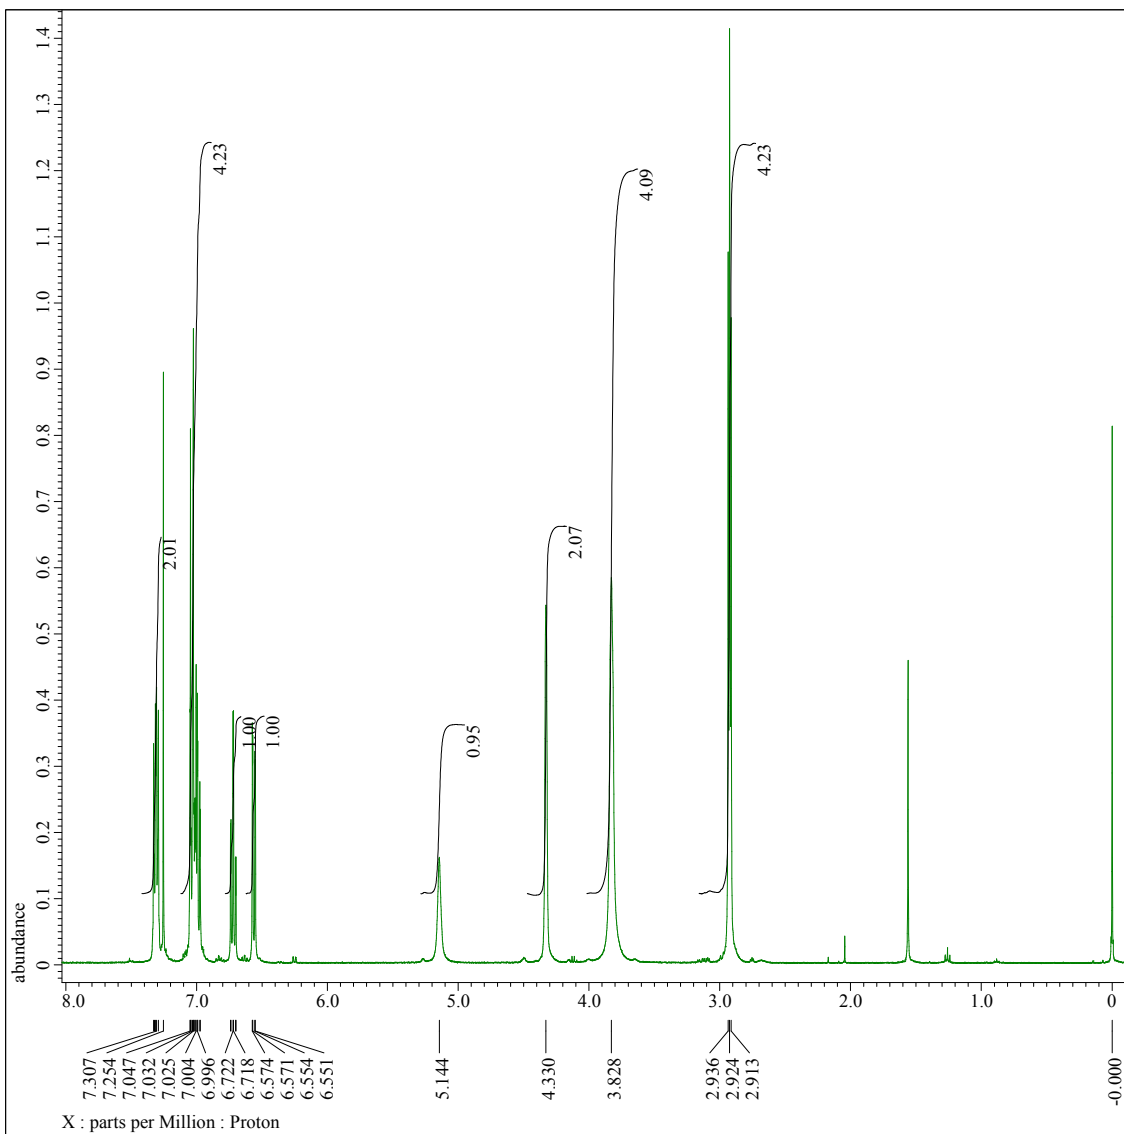

```

Filename      = M-HH7-28-1_Proton-1-5.jdf
Author       = delta
Experiment   = proton.jxp
Sample Id    = M-HH7-28-1
Solvent      = CHLOROFORM-D
Creation Time = 27-SEP-2017 06:26:53
Revision Time = 22-NOV-2017 11:33:52
Current Time  = 22-NOV-2017 11:34:12

Comment      = single_pulse
Data Format   = 1D_COMPLEX
Dim Size     = 13107
Dim Title    = Proton
Dim Units    = [ppm]
Dimensions   = X
Site         = JNM-ECS400
Spectrometer = DELTA2_NMR

Field Strength = 9.389766[T] (400[MHz])
X_Acq_Duration = 2.18365952[s]
X_Domain       = 1H
X_Freq         = 399.78219838[MHz]
X_Offset       = 5[ppm]
X_Points       = 16384
X_Frescans     = 1
X_Resolution   = 0.45794685[Hz]
X_Sweep        = 7.5030012[kHz]
X_Sweep_Clipped = 6.00240096[kHz]
Irr_Domain     = Proton
Irr_Freq       = 399.78219838[MHz]
Irr_Offset     = 5[ppm]
Tri_Domain     = Proton
Tri_Freq       = 399.78219838[MHz]
Tri_Offset     = 5[ppm]
Clipped        = FALSE
Scans          = 8
Total_Scans    = 8

Relaxation_Delay = 5[s]
Recvr Gain       = 34
Temp_Get         = 22[dC]
X_90_Width      = 13.67[us]
X_Acq_Time       = 2.18365952[s]
X_Angle         = 45[deg]
X_Atn           = 2.2[dB]
X_Pulse         = 6.835[us]
Irr_Mode        = Off
Tri_Mode        = Off
Dante_Presat    = FALSE
Initial_Wait     = 1[s]
Repetition_Time = 7.18365952[s]
  
```

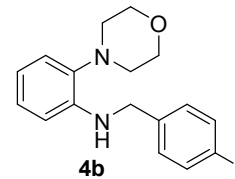



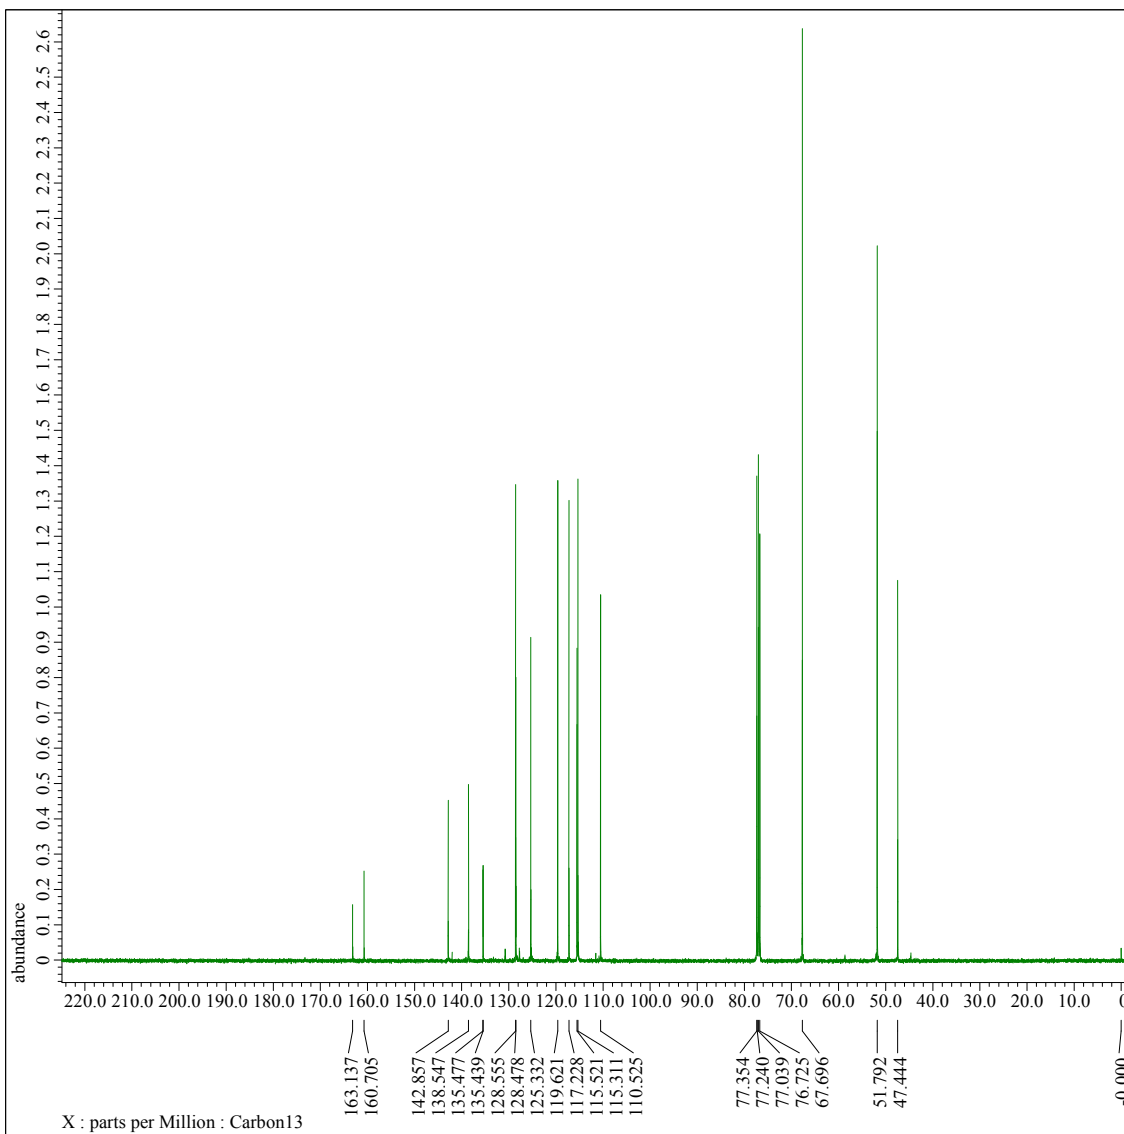

```

Filename      = M-HH7-28-1-C_Carbon-1-7.jd
Author       = delta
Experiment   = carbon.jxp
Sample Id    = M-HH7-28-1-C
Solvent      = CHLOROFORM-D
Creation Time = 1-OCT-2017 12:41:38
Revision Time = 22-NOV-2017 11:36:04
Current Time  = 22-NOV-2017 11:36:19

Comment      = single pulse decoupled gat
Data Format   = 1D COMPLEX
Dim Size     = 26214
Dim Title    = Carbon13
Dim Units    = [ppm]
Dimensions   = X
Site         = JNM-ECS400
Spectrometer = DELTA2_NMR

Field Strength = 9.389766[T] (400[MHz])
X Acq_Duration = 1.04333312[s]
X Domain       = 13C
X Freq         = 100.52530333[MHz]
X Offset       = 100 [ppm]
X Points      = 32768
X Freqs       = 4
X Resolution   = 0.95846665[Hz]
X Sweep       = 31.40703518[kHz]
X Sweep_Clip  = 25.12562814[kHz]
Irr_Domain    = Proton
Irr_Freq      = 399.78219838[MHz]
Irr_Offset    = 5 [ppm]
Clipped       = FALSE
Scans         = 4000
Total_Scans   = 4000

Relaxation_Delay = 2[s]
Recvr_Gain       = 60
Temp_Get         = 22.2[dC]
X_90_Width      = 9.74[us]
X_Acq_Time      = 1.04333312[s]
X_Angle         = 30[deg]
X_Atn           = 3.3[dB]
X_Pulse         = 3.24666667[us]
Irr_Atn_Dec     = 20.699[dB]
Irr_Atn_Noise  = 20.699[dB]
Irr_Noise      = WALTZ
Irr_Pwidth     = 0.115[ms]
Decoupling      = TRUE
Initial_Wait    = 1[s]
Noe             = TRUE
Noe_Time        = 2[s]
Repetition_Time = 3.04333312[s]
  
```

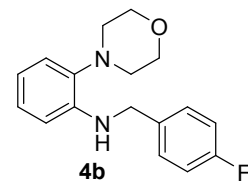

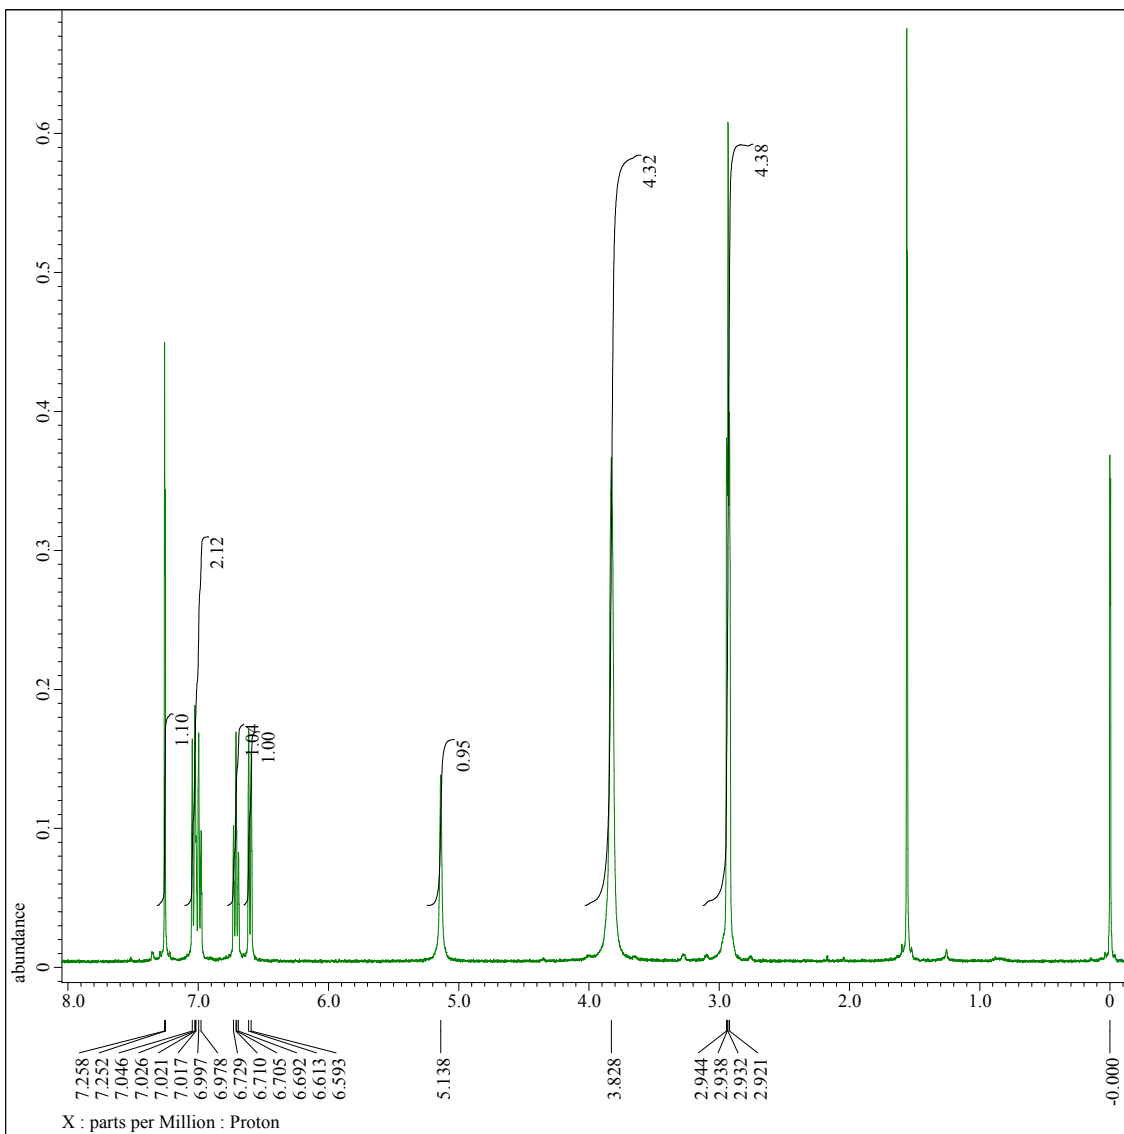

```

Filename      = M-HH7-33-D_Proton-1-4.jdf
Author       = delta
Experiment   = proton.jxp
Sample Id    = M-HH7-33-D
Solvent      = CHLOROFORM-D
Creation Time = 22-NOV-2016 13:29:40
Revision Time = 22-NOV-2017 11:43:34
Current Time  = 22-NOV-2017 11:44:33

Comment      = single_pulse
Data Format   = 1D_COMPLEX
Dim Size     = 13107
Dim Title    = Proton
Dim Units    = [ppm]
Dimensions   = X
Site         = JNM-ECS400
Spectrometer = DELTA2_NMR

Field Strength = 9.389766[T] (400[MHz])
X Acq Duration = 2.18365952[s]
X Domain      = 1H
X Freq        = 399.78219838[MHz]
X Offset      = 5[ppm]
X Points      = 16384
X Freqs cans  = 1
X Resolution  = 0.45794685[Hz]
X Sweep       = 7.5030012[kHz]
X Sweep Clipped = 6.00240096[kHz]
Irr Domain    = Proton
Irr Freq      = 399.78219838[MHz]
Irr Offset    = 5[ppm]
Tri Domain    = Proton
Tri Freq      = 399.78219838[MHz]
Tri Offset    = 5[ppm]
Clipped       = FALSE
Scans         = 8
Total Scans   = 8

Relaxation_Delay = 5[s]
Recvr Gain       = 36
Temp Get         = 21.6[dC]
X_90_Width      = 13.1[us]
X Acq Time       = 2.18365952[s]
X Angle          = 45[deg]
X Atn            = 2.2[db]
X Pulse         = 6.55[us]
Irr_Mode        = Off
Tri_Mode        = Off
Dante Presat    = FALSE
Initial Wait     = 1[s]
Repetition Time = 7.18365952[s]
  
```

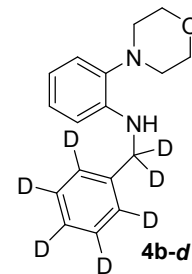

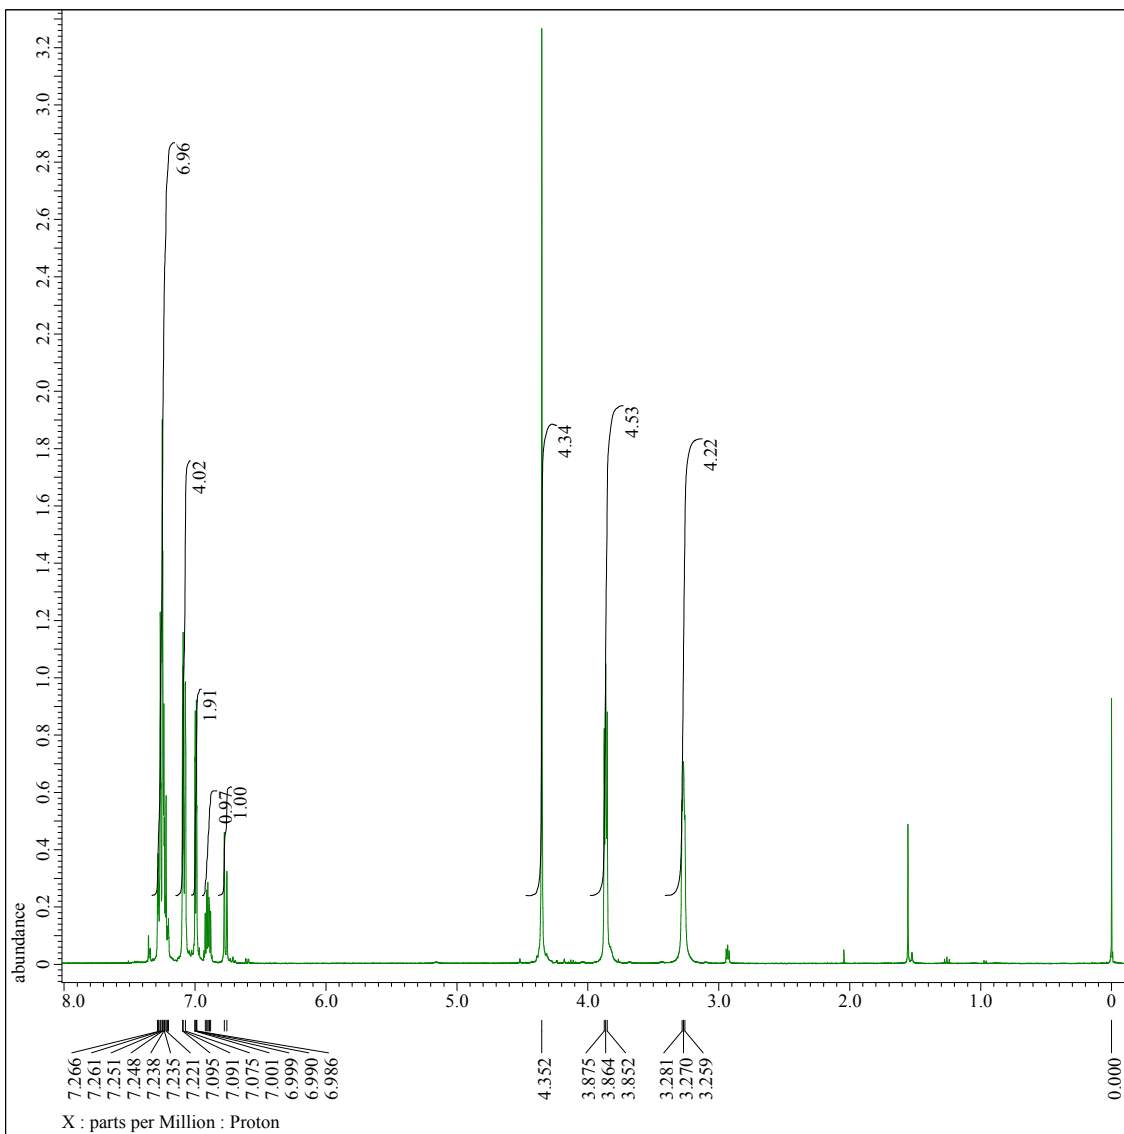

```

Filename      = ric-013-Ndi_Proton-1-6.jdf
Author       = delta
Experiment   = proton.jxp
Sample Id    = ric-013-Ndi
Solvent      = CHLOROFORM-D
Creation Time = 18-NOV-2017 09:49:39
Revision Time = 22-NOV-2017 11:39:06
Current Time  = 22-NOV-2017 11:39:17

Comment      = single_pulse
Data Format   = 1D_COMPLEX
Dim Size     = 13107
Dim Title    = Proton
Dim Units    = [ppm]
Dimensions   = X
Site         = JNM-ECS400
Spectrometer = DELTA2_NMR

Field Strength = 9.389766[T] (400[MHz])
X Acq_Duration = 2.18365952[s]
X_Domain      = 1H
X_Freq        = 399.78219838[MHz]
X_Offset      = 5[ppm]
X_Points      = 16384
X_Prescans    = 1
X_Resolution  = 0.45794685[Hz]
X_Sweep       = 7.5030012[kHz]
X_Sweep_Clipped = 6.00240096[kHz]
Irr_Domain    = Proton
Irr_Freq      = 399.78219838[MHz]
Irr_Offset    = 5[ppm]
Tri_Domain    = Proton
Tri_Freq      = 399.78219838[MHz]
Tri_Offset    = 5[ppm]
Clipped       = FALSE
Scans         = 8
Total_Scans   = 8

Relaxation_Delay = 5[s]
Recvr Gain      = 34
Temp_Get        = 21.6[dC]
X_90_Width     = 13.67[us]
X_Acq_Time     = 2.18365952[s]
X_Angle        = 45[deg]
X_Atn          = 2.2[dB]
X_Pulse        = 6.835[us]
Irr_Mode       = Off
Tri_Mode       = Off
Dante_Presat   = FALSE
Initial_Wait   = 1[s]
Repetition_Time = 7.18365952[s]
  
```

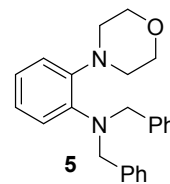

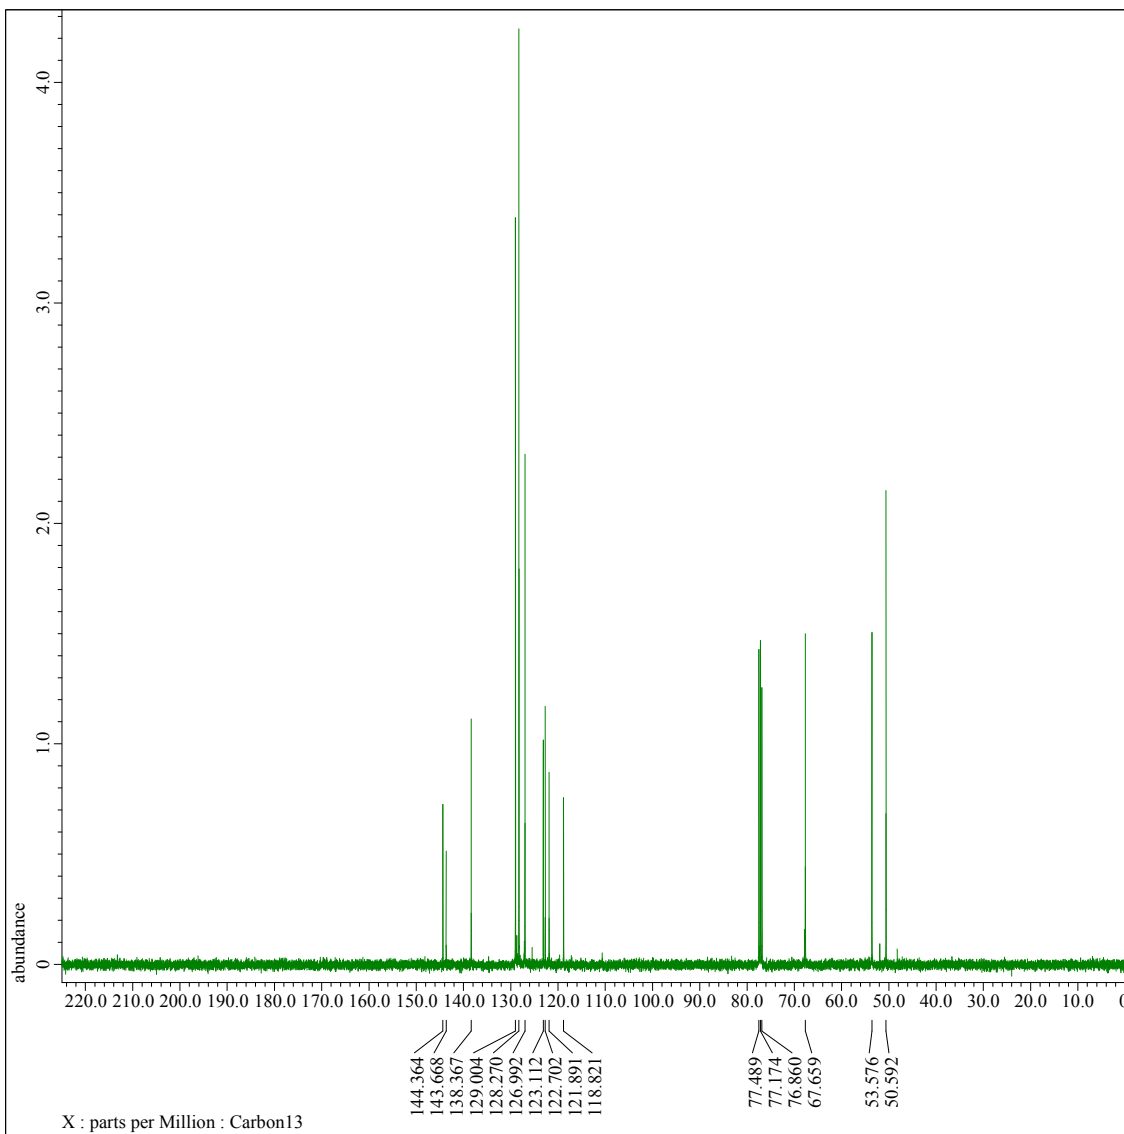

```

Filename      = M-ric-013-C_Carbon-1-4.jdf
Author       = delta
Experiment   = carbon.jxp
Sample Id    = M-ric-013-C
Solvent      = CHLOROFORM-D
Creation_Time = 22-NOV-2017 10:23:28
Revision_Time = 22-NOV-2017 12:24:00
Current_Time = 22-NOV-2017 12:24:17

Comment      = single pulse decoupled gat
Data Format   = 1D COMPLEX
Dim Size     = 26214
Dim Title    = Carbon13
Dim Units    = [ppm]
Dimensions   = X
Site         = JNM-ECS400
Spectrometer = DELTA2_NMR

Field Strength = 9.389766[T] (400[MHz])
X_Acq_Duration = 1.04333312[s]
X_Domain       = 13C
X_Freq         = 100.52530333[MHz]
X_Offset       = 100[ppm]
X_Points       = 32768
X_Prescans     = 4
X_Resolution   = 0.95846665[Hz]
X_Sweep        = 31.40703518[kHz]
X_Sweep_Clippped = 25.12562814[kHz]
Irr_Domain     = Proton
Irr_Freq       = 399.78219838[MHz]
Irr_Offset     = 5[ppm]
Clipped        = FALSE
Scans          = 160
Total_Scans    = 160

Relaxation_Delay = 2[s]
Recvr_Gain       = 60
Temp_Get         = 21.8[dC]
X_90_Width      = 9.74[us]
X_Acq_Time      = 1.04333312[s]
X_Angle         = 30[deg]
X_Atn           = 3.3[dB]
X_Pulse         = 3.24666667[us]
Irr_Atn_Dec     = 20.699[dB]
Irr_Atn_No     = 20.699[dB]
Irr_Noise       = WALTZ
Irr_Pwidth      = 0.115[ms]
Decoupling      = TRUE
Initial_Wait    = 1[s]
Noe             = TRUE
Noe_Time        = 2[s]
Repetition_Time = 3.04333312[s]
  
```

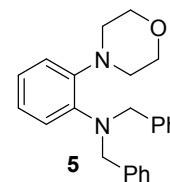

Supplement: c7gc03780e1.pdf [file c7gc03780e1.pdf]
